# Supplementary material for: Elucidating the mechanism and regioselectivity of phosphine-catalyzed transformation of MBH carbonate
Source: Royal Society of Chemistry journal article supplement (doi:10.1039/d3nj02382f), 2023-01-01
Supplement: d3nj02382f1.pdf [file d3nj02382f1.pdf]

**Electronic Supporting Information for**  
**Elucidating the mechanism and regioselectivity of Phosphine-catalyzed**  
**transformation of MBH carbonate**

Juan Ye<sup>a</sup>, Yilu Luo<sup>a</sup>, Gailing Huang<sup>a,\*</sup>, and Yang Wang<sup>a,\*</sup>

**Content**

|                                                                                                  |    |
|--------------------------------------------------------------------------------------------------|----|
| <b>Part 1:</b> Substituent effect .....                                                          | S2 |
| <b>Part 2:</b> Different addition modes between ylide and dicyanoheptafulvene .....              | S3 |
| <b>Part 3:</b> NBO analysis of allylic phosphorus ylide .....                                    | S4 |
| <b>Part 4:</b> Energy profile of the entire reaction .....                                       | S5 |
| <b>Part 5:</b> Cartesian coordinates of all the stationary points involved in the reaction ..... | S6 |

---

\* Corresponding authors: [wangyang@zzuli.edu.cn](mailto:wangyang@zzuli.edu.cn) (Y. Wang) and [glhuang99@126.com](mailto:glhuang99@126.com) (G. L. Huang)

## Part 1: Substituent effect

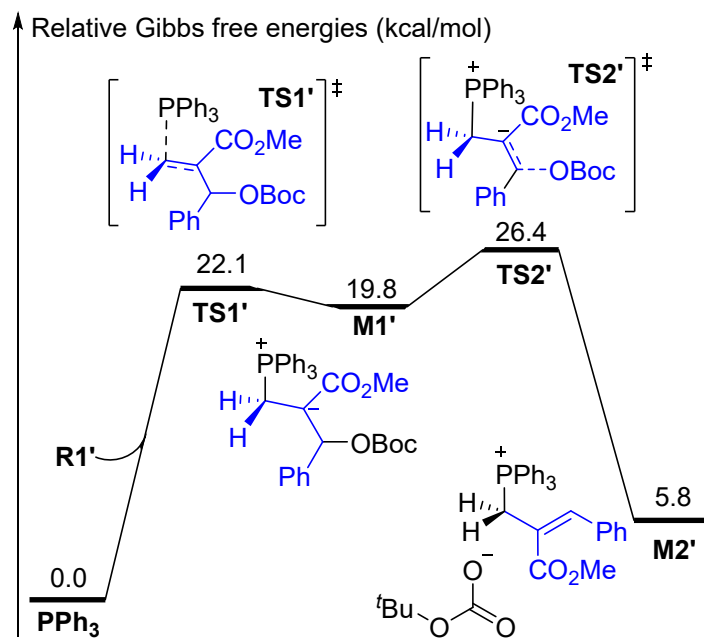

**Fig. S1** Gibbs free energy profiles for the formation of complex intermediate **M2'**

## Part 2: Different addition modes between ylide and dicyanoheptafulvene

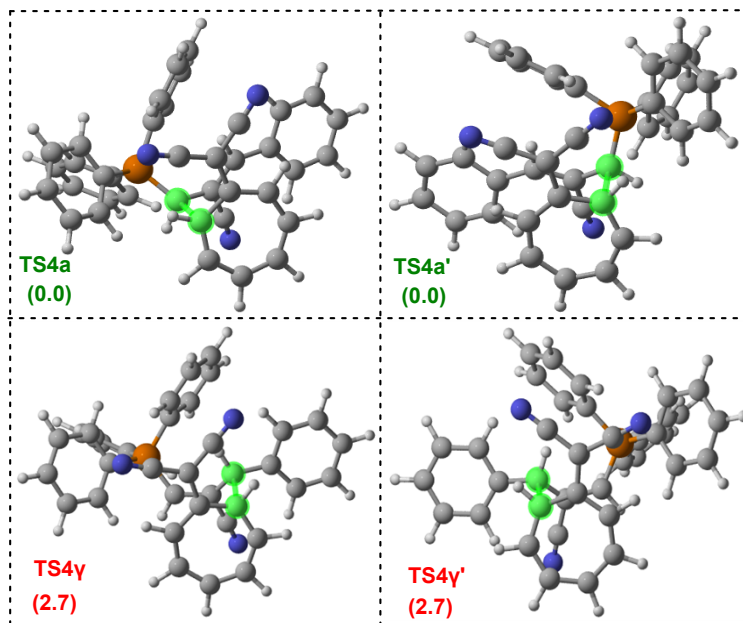

Fig. S2 3D structures and energies barriers involved in C-C bond formation process

### Part 3: NBO analysis of allylic phosphorus ylide

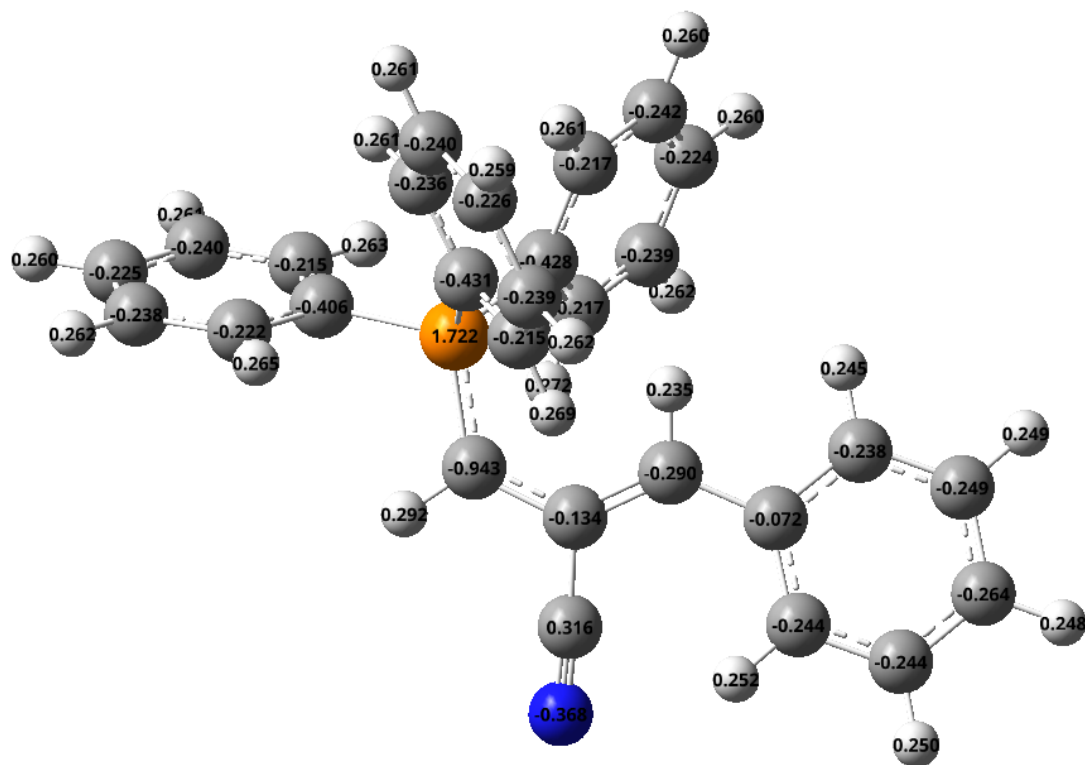

Fig. S3 NPA charge of  $\alpha$ - and  $\gamma$ -carbon atoms in the allylic phosphorus ylide

## Part 4: Energy profile of the entire reaction

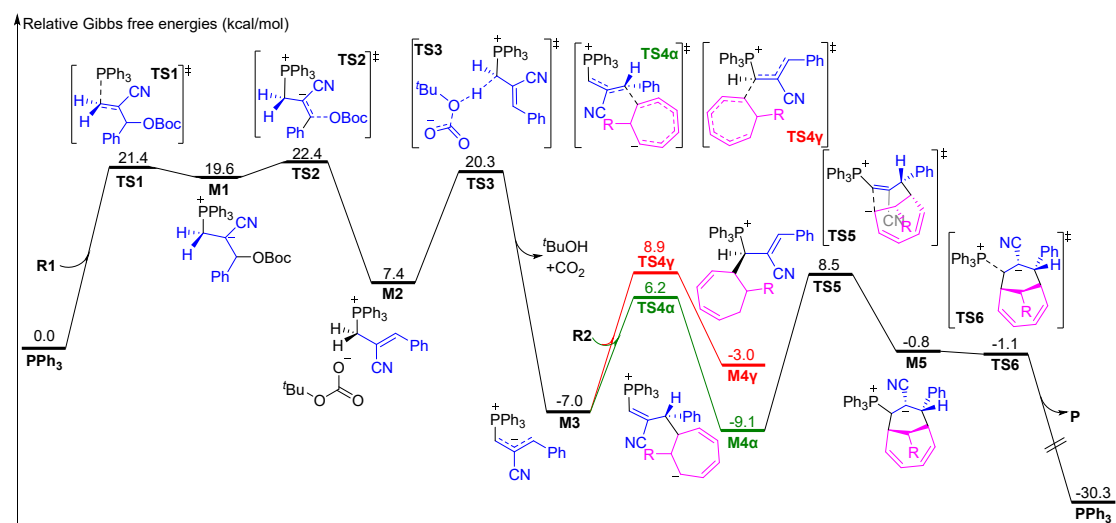

Fig. S4 The energy profile for the entire catalytic cycle

## Part 5: Cartesian coordinates of all the stationary points involved in the reaction

|    |             |             |             |
|----|-------------|-------------|-------------|
| R1 |             |             |             |
| C  | 0.93849000  | 1.29456100  | -1.00294500 |
| H  | 1.60484500  | 1.75162300  | -1.74095600 |
| C  | 0.73371200  | 2.35451900  | 0.06834000  |
| C  | 1.07564100  | 3.62647200  | -0.14567600 |
| H  | 0.90953800  | 4.39125800  | 0.60359100  |
| H  | 1.51972800  | 3.92473300  | -1.08900800 |
| C  | 0.16978100  | 2.01660100  | 1.35418000  |
| C  | 1.57070800  | -0.00398200 | -0.53545100 |
| C  | 1.38581900  | -1.17318100 | -1.27632100 |
| C  | 2.38309300  | -0.03360600 | 0.59643900  |
| C  | 1.97915300  | -2.36296500 | -0.87006800 |
| H  | 0.76562700  | -1.15384100 | -2.16833200 |
| C  | 2.98187000  | -1.22633300 | 1.00054400  |
| H  | 2.55400000  | 0.87003800  | 1.17408800  |
| C  | 2.77616300  | -2.39435100 | 0.27460800  |
| H  | 1.81922400  | -3.26811500 | -1.44743600 |
| H  | 3.60440200  | -1.23847900 | 1.88908700  |
| H  | 3.23599600  | -3.32396800 | 0.59366600  |
| O  | -0.26094100 | 1.10208900  | -1.77158500 |
| C  | -1.32819500 | 0.43992500  | -1.27283400 |
| O  | -2.32263600 | 0.30689900  | -1.93826000 |
| O  | -1.09879200 | -0.00349600 | -0.04906900 |
| C  | -1.99286000 | -0.97527300 | 0.59332400  |
| C  | -3.26988500 | -0.25692400 | 1.00271900  |
| C  | -2.24522800 | -2.15167100 | -0.34349000 |
| C  | -1.18055000 | -1.42908400 | 1.79985000  |
| H  | -3.02388000 | 0.60659300  | 1.62703300  |
| H  | -3.82424600 | 0.07722200  | 0.12382000  |
| H  | -3.90044000 | -0.93703400 | 1.58185700  |
| H  | -1.28999400 | -2.55757600 | -0.69177700 |
| H  | -2.76733300 | -2.93516000 | 0.21200400  |
| H  | -2.85124400 | -1.86494200 | -1.20207400 |
| H  | -1.73815100 | -2.19352900 | 2.34709500  |
| H  | -0.22819800 | -1.85458600 | 1.46635700  |
| H  | -0.97442900 | -0.59002500 | 2.46653400  |
| N  | -0.26039400 | 1.81480100  | 2.40949400  |

R1'

|   |             |             |             |
|---|-------------|-------------|-------------|
| C | 0.47725200  | -1.23391400 | 1.35978400  |
| H | 0.87396900  | -1.88503000 | 2.14538700  |
| C | -0.68853200 | -1.99306400 | 0.75637700  |
| C | -1.14213900 | -3.09521000 | 1.35241500  |
| H | -2.01149000 | -3.62506700 | 0.97666400  |
| H | -0.65153000 | -3.50228500 | 2.23165600  |
| C | 1.63757300  | -0.85615500 | 0.45591200  |
| C | 2.43776600  | 0.24151200  | 0.78071400  |
| C | 1.98084300  | -1.64926800 | -0.63770400 |
| C | 3.54491100  | 0.56273000  | 0.00181300  |
| H | 2.19452900  | 0.85261100  | 1.64544500  |
| C | 3.09381800  | -1.33076600 | -1.41366800 |
| H | 1.36387900  | -2.50180900 | -0.90118200 |
| C | 3.87463900  | -0.22136000 | -1.10192900 |
| H | 4.15111700  | 1.42517100  | 0.26049300  |
| H | 3.34452100  | -1.94970200 | -2.26912500 |
| H | 4.73657900  | 0.02903700  | -1.71172800 |
| O | -0.00992500 | -0.12014900 | 2.14106100  |
| C | -0.46574700 | 1.01034300  | 1.57376200  |
| O | -0.79163100 | 1.94504100  | 2.26125600  |
| O | -0.49332800 | 0.93538500  | 0.24911700  |
| C | -0.67414800 | 2.15078600  | -0.55701900 |
| C | -2.10215800 | 2.65091800  | -0.38826000 |
| C | 0.36436600  | 3.19615600  | -0.16413500 |
| C | -0.40977600 | 1.65873400  | -1.97308500 |
| H | -2.80705400 | 1.83864000  | -0.58746800 |
| H | -2.26694400 | 3.02370500  | 0.62323300  |
| H | -2.29069600 | 3.45740200  | -1.10204700 |
| H | 1.36842600  | 2.76752700  | -0.23696300 |
| H | 0.29705000  | 4.03380100  | -0.86361400 |
| H | 0.20043700  | 3.57010400  | 0.84625600  |
| H | -0.48222600 | 2.49769300  | -2.66976600 |
| H | 0.59320200  | 1.22566100  | -2.03509700 |
| H | -1.12675300 | 0.88768100  | -2.26138500 |
| C | -1.38614400 | -1.54536000 | -0.49648600 |
| O | -0.87828700 | -1.46450600 | -1.58928100 |
| O | -2.68820400 | -1.32680100 | -0.26875000 |
| C | -3.47159200 | -1.04307600 | -1.43218000 |
| H | -4.49431000 | -0.92997500 | -1.07874000 |
| H | -3.12969500 | -0.12179700 | -1.90840400 |
| H | -3.39759300 | -1.86316800 | -2.14870600 |

R2

|   |             |             |             |
|---|-------------|-------------|-------------|
| C | -3.02370200 | 0.67947300  | -0.00007300 |
| C | -3.02370200 | -0.67947300 | -0.00007400 |
| C | -1.88804100 | -1.54997900 | 0.00000400  |
| C | -1.88804100 | 1.54997900  | 0.00000300  |
| C | -0.55704900 | -1.27036800 | 0.00009200  |
| C | -0.55704800 | 1.27036700  | 0.00008900  |
| H | -3.99005800 | 1.17473200  | -0.00013400 |
| H | -3.99005800 | -1.17473200 | -0.00013500 |
| H | -2.13047500 | -2.60928000 | 0.00002200  |
| H | -2.13047500 | 2.60928000  | -0.00000700 |
| H | 0.09754400  | -2.13745800 | 0.00015900  |
| H | 0.09754500  | 2.13745700  | 0.00012700  |
| C | 0.12827400  | 0.00000000  | 0.00013100  |
| C | 1.52236300  | 0.00000000  | 0.00003500  |
| C | 2.27911400  | -1.20828900 | -0.00002400 |
| N | 2.88702100  | -2.19652600 | -0.00007400 |
| C | 2.27911300  | 1.20828900  | -0.00003000 |
| N | 2.88702000  | 2.19652600  | -0.00006100 |

PPh<sub>3</sub>

|   |            |             |             |
|---|------------|-------------|-------------|
| P | 1.77566000 | -0.30846200 | 0.44358300  |
| C | 3.47660900 | -0.34985800 | 1.15498100  |
| C | 4.42289600 | 0.66585200  | 0.98586900  |
| C | 3.82450500 | -1.48287300 | 1.90118700  |
| C | 5.69191000 | 0.54749100  | 1.54974800  |
| H | 4.16819000 | 1.55191900  | 0.41158200  |
| C | 5.09572000 | -1.60621700 | 2.45416000  |
| H | 3.09241300 | -2.27304800 | 2.04968700  |
| C | 6.03133600 | -0.58813200 | 2.28139900  |
| H | 6.41780400 | 1.34307900  | 1.41405400  |
| H | 5.35295900 | -2.49144300 | 3.02703200  |
| H | 7.02037600 | -0.67860300 | 2.71916800  |
| C | 1.64714200 | 1.44853100  | -0.10313000 |
| C | 1.98771300 | 1.89713300  | -1.38323100 |
| C | 1.17877200 | 2.37522700  | 0.83645400  |
| C | 1.86326500 | 3.24492900  | -1.71433500 |
| H | 2.35182900 | 1.19151200  | -2.12447300 |
| C | 1.06490400 | 3.72313100  | 0.50909200  |
| H | 0.89806700 | 2.03660100  | 1.83092000  |
| C | 1.40454900 | 4.15990800  | -0.76973500 |
| H | 2.12845900 | 3.58014500  | -2.71218700 |
| H | 0.70151600 | 4.43004700  | 1.24822400  |
| H | 1.30812800 | 5.20920000  | -1.02991200 |



|   |             |             |             |
|---|-------------|-------------|-------------|
| C | 2.03196000  | -1.16681000 | -1.16795600 |
| C | 3.28472900  | -1.49324100 | -1.69590200 |
| C | 0.88271600  | -1.49571100 | -1.89801500 |
| C | 3.38383100  | -2.13154500 | -2.93112500 |
| H | 4.18616200  | -1.24711800 | -1.14217700 |
| C | 0.98237100  | -2.12174200 | -3.13664100 |
| H | -0.09779100 | -1.25809800 | -1.49180700 |
| C | 2.23550600  | -2.44329900 | -3.65458600 |
| H | 4.36206600  | -2.38170600 | -3.32997800 |
| H | 0.08316100  | -2.36644200 | -3.69300100 |
| H | 2.31667400  | -2.93829900 | -4.61711100 |

<sup>t</sup>BuOH

|   |             |             |             |
|---|-------------|-------------|-------------|
| C | -0.68154900 | -1.25388000 | -0.52180500 |
| C | 0.00585500  | -0.00007800 | 0.01764100  |
| H | -0.21244400 | -2.14861300 | -0.10371200 |
| H | -1.74212900 | -1.25848000 | -0.24635900 |
| H | -0.61680900 | -1.30055800 | -1.61277900 |
| C | -0.66784600 | 1.26123700  | -0.52170500 |
| C | 1.49003400  | -0.00797700 | -0.32653600 |
| H | -0.18905100 | 2.15045200  | -0.10272100 |
| H | -0.60203300 | 1.30777600  | -1.61264400 |
| H | -1.72836100 | 1.27697900  | -0.24654800 |
| H | 1.63437800  | -0.00797300 | -1.41013800 |
| H | 1.97744500  | 0.87644100  | 0.09284100  |
| H | 1.96752100  | -0.89833100 | 0.09163800  |
| O | -0.04849300 | 0.00017900  | 1.44544400  |
| H | -0.97953900 | 0.00506500  | 1.70129900  |

CO<sub>2</sub>

|   |            |            |             |
|---|------------|------------|-------------|
| C | 0.00000000 | 0.00000000 | 0.00000000  |
| O | 0.00000000 | 0.00000000 | 1.16274600  |
| O | 0.00000000 | 0.00000000 | -1.16274600 |

TS1

|   |             |             |             |
|---|-------------|-------------|-------------|
| C | 1.46470400  | -1.45368000 | -0.62974500 |
| H | 0.97954200  | -2.43358000 | -0.54324900 |
| C | 0.70647800  | -0.67990100 | -1.65053600 |
| C | -0.66600600 | -0.97736100 | -1.81629300 |
| H | -1.18326700 | -0.50542500 | -2.65185600 |
| H | -0.95272800 | -2.02181100 | -1.68325200 |

|   |             |             |             |
|---|-------------|-------------|-------------|
| C | 1.22975700  | 0.48644900  | -2.24896200 |
| C | 2.94777300  | -1.69177300 | -0.85949400 |
| C | 3.77492600  | -2.02135300 | 0.21888000  |
| C | 3.49685000  | -1.64415600 | -2.13940900 |
| C | 5.12966700  | -2.26463700 | 0.02596400  |
| H | 3.35437100  | -2.07217300 | 1.21937900  |
| C | 4.85585200  | -1.89282700 | -2.33474600 |
| H | 2.86440400  | -1.40298300 | -2.98712000 |
| C | 5.67829800  | -2.19617900 | -1.25505000 |
| H | 5.75842400  | -2.50981900 | 0.87652800  |
| H | 5.26973400  | -1.84116900 | -3.33692700 |
| H | 6.73643200  | -2.38274900 | -1.40806600 |
| O | 1.20631800  | -0.94122200 | 0.73325600  |
| C | 1.72202400  | 0.22373400  | 1.15221100  |
| O | 1.40244200  | 0.68447500  | 2.22519000  |
| O | 2.57996300  | 0.72796300  | 0.28174000  |
| C | 3.53276200  | 1.77491000  | 0.63706500  |
| C | 2.79293500  | 3.09642400  | 0.77114800  |
| C | 4.28653900  | 1.38945500  | 1.90513000  |
| C | 4.46828500  | 1.77267300  | -0.56588100 |
| H | 2.26951300  | 3.31720600  | -0.16298500 |
| H | 2.06610400  | 3.04995000  | 1.58490800  |
| H | 3.50900400  | 3.89846900  | 0.97286000  |
| H | 4.72592400  | 0.39420500  | 1.78451700  |
| H | 5.09619800  | 2.10675100  | 2.06477900  |
| H | 3.63343200  | 1.39409600  | 2.77799100  |
| H | 5.24361400  | 2.53248100  | -0.43550500 |
| H | 4.93896700  | 0.78865800  | -0.66698900 |
| H | 3.90147400  | 1.98275400  | -1.47659800 |
| N | 1.62722700  | 1.43974100  | -2.79514100 |
| P | -2.04537800 | -0.25234600 | -0.26037000 |
| C | -3.65674900 | 0.07796800  | -1.04184800 |
| C | -4.43354200 | 1.18817700  | -0.69394400 |
| C | -4.10302900 | -0.79390300 | -2.04310400 |
| C | -5.64869400 | 1.41326200  | -1.33320700 |
| H | -4.08565200 | 1.87519800  | 0.07174000  |
| C | -5.32307200 | -0.56778600 | -2.67447300 |
| H | -3.50123000 | -1.65319400 | -2.32960700 |
| C | -6.09476000 | 0.53648700  | -2.32027700 |
| H | -6.24781400 | 2.27549700  | -1.05991900 |
| H | -5.66560800 | -1.24884600 | -3.44626600 |
| H | -7.04288200 | 0.71605700  | -2.81638700 |
| C | -1.50456400 | 1.32293500  | 0.44233400  |
| C | -1.76372600 | 1.69841900  | 1.76514000  |

|   |             |             |             |
|---|-------------|-------------|-------------|
| C | -0.88737000 | 2.22679300  | -0.43107500 |
| C | -1.40969300 | 2.96938300  | 2.20592500  |
| H | -2.24625400 | 1.00434200  | 2.44592000  |
| C | -0.54869100 | 3.50074800  | 0.01388100  |
| H | -0.67797000 | 1.94856700  | -1.45947100 |
| C | -0.80622900 | 3.87099200  | 1.33148400  |
| H | -1.61220200 | 3.25691900  | 3.23227200  |
| H | -0.07870700 | 4.19922900  | -0.67064300 |
| H | -0.53453100 | 4.86295200  | 1.67829100  |
| C | -2.35245600 | -1.42068600 | 1.09659300  |
| C | -3.43383300 | -2.30853900 | 1.02686600  |
| C | -1.44770700 | -1.51209400 | 2.16501200  |
| C | -3.61045200 | -3.27317000 | 2.01362900  |
| H | -4.14683300 | -2.24116500 | 0.21094600  |
| C | -1.63865600 | -2.47749700 | 3.14974000  |
| H | -0.60409300 | -0.83220700 | 2.23190800  |
| C | -2.71380600 | -3.35995000 | 3.07603500  |
| H | -4.45448900 | -3.95240300 | 1.95443300  |
| H | -0.94051400 | -2.53728700 | 3.97822000  |
| H | -2.85495100 | -4.11115000 | 3.84623900  |

TS1'

|   |             |             |             |
|---|-------------|-------------|-------------|
| C | -1.37373393 | 1.12792441  | -1.01885524 |
| H | -0.89169193 | 2.03487441  | -1.40596324 |
| C | -0.60661793 | -0.01558759 | -1.60315824 |
| C | 0.72351307  | 0.24786941  | -1.95319724 |
| H | 1.24415007  | -0.51744759 | -2.52413724 |
| H | 0.99469007  | 1.27229241  | -2.20520424 |
| C | -2.85212293 | 1.30303041  | -1.32142424 |
| C | -3.68716993 | 1.99257141  | -0.44068424 |
| C | -3.36160693 | 0.90647941  | -2.55785124 |
| C | -5.01911993 | 2.23589241  | -0.76723924 |
| H | -3.29459993 | 2.34668741  | 0.50811376  |
| C | -4.69062693 | 1.15466641  | -2.89009824 |
| H | -2.71268293 | 0.38405441  | -3.25300924 |
| C | -5.52859793 | 1.81161541  | -1.99202524 |
| H | -5.65666193 | 2.76314241  | -0.06380124 |
| H | -5.07308993 | 0.82882341  | -3.85243824 |
| H | -6.56669093 | 1.99926041  | -2.24744824 |
| O | -1.07001693 | 1.31677541  | 0.40972776  |
| C | -1.55426793 | 0.54257441  | 1.39034676  |
| O | -1.20506693 | 0.72749441  | 2.53335176  |
| O | -2.42781693 | -0.35462459 | 0.95382976  |

|   |             |             |             |
|---|-------------|-------------|-------------|
| C | -3.38897393 | -0.96084959 | 1.87734176  |
| C | -2.67754093 | -1.93899659 | 2.80125676  |
| C | -4.13052893 | 0.12525641  | 2.65202676  |
| C | -4.34525093 | -1.68718459 | 0.94122276  |
| H | -2.18598893 | -2.71821159 | 2.21309076  |
| H | -1.92783493 | -1.42745659 | 3.40615876  |
| H | -3.41281093 | -2.41205559 | 3.45924876  |
| H | -4.60834793 | 0.82122141  | 1.95649276  |
| H | -4.91118293 | -0.34449659 | 3.25638276  |
| H | -3.45926493 | 0.67331441  | 3.31383276  |
| H | -5.17254293 | -2.11112359 | 1.51672776  |
| H | -4.74124993 | -0.99243359 | 0.19435276  |
| H | -3.82522893 | -2.49540059 | 0.42397476  |
| P | 2.19977000  | 0.18491300  | -0.31045800 |
| C | 3.68806300  | -0.69754600 | -0.87558800 |
| C | 4.27696200  | -1.72060900 | -0.12573000 |
| C | 4.21759200  | -0.36829700 | -2.13062600 |
| C | 5.38943700  | -2.39489500 | -0.62027600 |
| H | 3.86449500  | -1.98814800 | 0.84229000  |
| C | 5.33595800  | -1.03903400 | -2.61628000 |
| H | 3.75834300  | 0.41736900  | -2.72671700 |
| C | 5.92113900  | -2.05410000 | -1.86183400 |
| H | 5.84156500  | -3.18779200 | -0.03339700 |
| H | 5.74440000  | -0.77555500 | -3.58628700 |
| H | 6.78831400  | -2.58266700 | -2.24414900 |
| C | 1.61485200  | -0.71504800 | 1.14581700  |
| C | 1.86797500  | -0.28850100 | 2.45337600  |
| C | 0.93437900  | -1.92001600 | 0.92100400  |
| C | 1.45467800  | -1.06681600 | 3.52955100  |
| H | 2.39084000  | 0.64572300  | 2.63097600  |
| C | 0.54756400  | -2.70261300 | 2.00517300  |
| H | 0.72486700  | -2.25633000 | -0.09246800 |
| C | 0.80261200  | -2.27717500 | 3.30679000  |
| H | 1.65237800  | -0.73144200 | 4.54234600  |
| H | 0.03940000  | -3.64559200 | 1.83000700  |
| H | 0.48775800  | -2.88706800 | 4.14803600  |
| C | 2.75042400  | 1.82322400  | 0.26095000  |
| C | 4.04281300  | 2.30600400  | 0.02955600  |
| C | 1.80601200  | 2.64389500  | 0.89685300  |
| C | 4.38651200  | 3.59486700  | 0.42941600  |
| H | 4.78361300  | 1.67777500  | -0.45494800 |
| C | 2.16128200  | 3.92769200  | 1.29792900  |
| H | 0.80722400  | 2.26338600  | 1.09742000  |
| C | 3.44886200  | 4.40692700  | 1.06204400  |

|    |             |             |             |
|----|-------------|-------------|-------------|
| H  | 5.39245800  | 3.96106300  | 0.25143100  |
| H  | 1.42918600  | 4.55430900  | 1.79688500  |
| H  | 3.72195300  | 5.40958600  | 1.37504600  |
| C  | -1.01753893 | -1.39367859 | -1.75303224 |
| O  | -0.24960493 | -2.31634459 | -2.02825924 |
| O  | -2.34701093 | -1.62025059 | -1.64338924 |
| C  | -2.75155093 | -2.95063259 | -1.93825124 |
| H  | -3.83978293 | -2.95136259 | -1.88052824 |
| H  | -2.42405693 | -3.24502559 | -2.93793324 |
| H  | -2.33325393 | -3.65644659 | -1.21480624 |
|    |             |             |             |
| M1 |             |             |             |
| C  | 1.48089700  | -1.47532900 | -0.30482400 |
| H  | 0.95327700  | -2.41417600 | -0.08949100 |
| C  | 0.67355400  | -0.71686800 | -1.27510100 |
| C  | -0.76541000 | -1.02746200 | -1.42773600 |
| H  | -1.16377100 | -0.71426800 | -2.39979000 |
| H  | -0.98098900 | -2.09866900 | -1.31248100 |
| C  | 1.19680000  | 0.31427400  | -2.05608200 |
| C  | 2.91302300  | -1.82755800 | -0.68380300 |
| C  | 3.85294100  | -2.13244000 | 0.30629700  |
| C  | 3.29267900  | -1.93299500 | -2.02155600 |
| C  | 5.14593700  | -2.51366300 | -0.03379600 |
| H  | 3.56761300  | -2.05702300 | 1.35085900  |
| C  | 4.58941000  | -2.31548500 | -2.36401000 |
| H  | 2.57017600  | -1.71099200 | -2.79906600 |
| C  | 5.52187100  | -2.60435900 | -1.37364900 |
| H  | 5.86349900  | -2.73915800 | 0.74938200  |
| H  | 4.86797600  | -2.38313000 | -3.41121000 |
| H  | 6.53229400  | -2.89802400 | -1.64028500 |
| O  | 1.45412900  | -0.89692200 | 1.08383900  |
| C  | 1.89621000  | 0.34272900  | 1.29563900  |
| O  | 1.50159200  | 0.99473000  | 2.24207000  |
| O  | 2.79765500  | 0.71469700  | 0.40031600  |
| C  | 3.41812300  | 2.03428000  | 0.42806700  |
| C  | 2.35202000  | 3.09349700  | 0.18609700  |
| C  | 4.16696500  | 2.23092100  | 1.74178700  |
| C  | 4.38828100  | 1.95573800  | -0.74467600 |
| H  | 1.86238400  | 2.89566100  | -0.77155700 |
| H  | 1.60569600  | 3.08574100  | 0.98370700  |
| H  | 2.82218500  | 4.08101100  | 0.14831300  |
| H  | 4.84614700  | 1.38999000  | 1.91259700  |
| H  | 4.76335000  | 3.14551900  | 1.67821200  |

|     |             |             |             |
|-----|-------------|-------------|-------------|
| H   | 3.47912000  | 2.31289600  | 2.58312700  |
| H   | 4.91868600  | 2.90589200  | -0.85186900 |
| H   | 5.11871900  | 1.15838300  | -0.57713900 |
| H   | 3.83608000  | 1.74121800  | -1.66309900 |
| N   | 1.57974100  | 1.17227500  | -2.76116500 |
| P   | -2.00215300 | -0.25154700 | -0.20986900 |
| C   | -3.63382700 | -0.28367500 | -1.00183100 |
| C   | -4.54466400 | 0.76091800  | -0.81427900 |
| C   | -3.97080700 | -1.36759400 | -1.82277200 |
| C   | -5.78778900 | 0.71339600  | -1.43733800 |
| H   | -4.28006500 | 1.61015000  | -0.19130200 |
| C   | -5.21689300 | -1.40870200 | -2.44003300 |
| H   | -3.26816200 | -2.18057500 | -1.98324300 |
| C   | -6.12376000 | -0.36906100 | -2.24783700 |
| H   | -6.49331200 | 1.52436800  | -1.29230300 |
| H   | -5.47557900 | -2.24987100 | -3.07388100 |
| H   | -7.09327600 | -0.40111600 | -2.73393000 |
| C   | -1.59835100 | 1.47061500  | 0.12863100  |
| C   | -1.88234000 | 2.06457800  | 1.36353100  |
| C   | -1.11001400 | 2.24582700  | -0.92977400 |
| C   | -1.66536900 | 3.42809100  | 1.53759900  |
| H   | -2.27209200 | 1.47088300  | 2.18410300  |
| C   | -0.90393900 | 3.60875000  | -0.74782700 |
| H   | -0.87928500 | 1.79732400  | -1.89042600 |
| C   | -1.17763900 | 4.19826800  | 0.48415200  |
| H   | -1.87838500 | 3.88686600  | 2.49702900  |
| H   | -0.51617500 | 4.20403400  | -1.56757400 |
| H   | -1.00881200 | 5.26096400  | 0.62521600  |
| C   | -2.11306000 | -1.18953200 | 1.33065200  |
| C   | -3.06362200 | -2.21292500 | 1.44587200  |
| C   | -1.20396600 | -0.95349300 | 2.36961600  |
| C   | -3.09890500 | -2.99804900 | 2.59264600  |
| H   | -3.78126700 | -2.39127700 | 0.65123900  |
| C   | -1.25240600 | -1.74552700 | 3.51349700  |
| H   | -0.45873400 | -0.16866900 | 2.29490200  |
| C   | -2.19288800 | -2.76566700 | 3.62593600  |
| H   | -3.83857200 | -3.78648500 | 2.68104000  |
| H   | -0.54663900 | -1.56023800 | 4.31609100  |
| H   | -2.22336100 | -3.37896700 | 4.52062900  |
| MI' |             |             |             |
| C   | -1.23693000 | -1.40394300 | 0.36159300  |
| H   | -0.67096900 | -2.33922300 | 0.23237100  |

|   |             |             |             |
|---|-------------|-------------|-------------|
| C | -0.53768700 | -0.61325900 | 1.39414200  |
| C | 0.92332100  | -0.85128000 | 1.52044700  |
| H | 1.29383500  | -0.36605800 | 2.42910200  |
| H | 1.19279800  | -1.91799300 | 1.55031600  |
| C | -2.68280600 | -1.83463900 | 0.54548200  |
| C | -3.54411800 | -1.98501600 | -0.54166000 |
| C | -3.12852200 | -2.22484700 | 1.80987600  |
| C | -4.83793000 | -2.47228000 | -0.36462000 |
| H | -3.20480400 | -1.72325100 | -1.53881200 |
| C | -4.41532400 | -2.72262300 | 1.98838800  |
| H | -2.45774100 | -2.11689700 | 2.65623900  |
| C | -5.28098800 | -2.83988200 | 0.90245000  |
| H | -5.49633400 | -2.56915100 | -1.22294300 |
| H | -4.74529000 | -3.01398300 | 2.98094500  |
| H | -6.28766800 | -3.22104000 | 1.04226000  |
| O | -1.01092700 | -0.86119900 | -1.01215200 |
| C | -1.51779100 | 0.29087700  | -1.44680800 |
| O | -1.15946900 | 0.74626400  | -2.51493800 |
| O | -2.42281300 | 0.80836500  | -0.62899100 |
| C | -3.35435500 | 1.82884100  | -1.10262900 |
| C | -2.61889600 | 3.12981800  | -1.39591900 |
| C | -4.11156600 | 1.30307800  | -2.31831700 |
| C | -4.29745300 | 1.99751000  | 0.08035800  |
| H | -2.07091100 | 3.45314000  | -0.50747000 |
| H | -1.91585100 | 3.00948200  | -2.22063900 |
| H | -3.34953100 | 3.90259400  | -1.65346200 |
| H | -4.59954900 | 0.35566300  | -2.06964300 |
| H | -4.88319100 | 2.02465600  | -2.60066700 |
| H | -3.44275700 | 1.15545900  | -3.16728800 |
| H | -5.08269400 | 2.71514500  | -0.17257000 |
| H | -4.75406800 | 1.03716600  | 0.33630900  |
| H | -3.74590300 | 2.35991300  | 0.95006200  |
| P | 2.07965200  | -0.21586500 | 0.18412300  |
| C | 3.70946300  | 0.01404200  | 0.95834200  |
| C | 4.59532200  | 0.97591600  | 0.46253500  |
| C | 4.08455500  | -0.78683000 | 2.04332000  |
| C | 5.84880400  | 1.12954300  | 1.04587600  |
| H | 4.30362700  | 1.60938900  | -0.36981400 |
| C | 5.34168100  | -0.62945200 | 2.62002300  |
| H | 3.40252900  | -1.53103000 | 2.44352000  |
| C | 6.22235600  | 0.32763300  | 2.12229000  |
| H | 6.53235300  | 1.87880700  | 0.66129600  |
| H | 5.62790400  | -1.25032400 | 3.46198700  |
| H | 7.19977800  | 0.45221000  | 2.57653800  |

|   |             |             |             |
|---|-------------|-------------|-------------|
| C | 1.57268200  | 1.37943300  | -0.47213400 |
| C | 1.92362600  | 1.78850400  | -1.76348300 |
| C | 0.91575300  | 2.25665600  | 0.40053400  |
| C | 1.60776300  | 3.07543600  | -2.18650000 |
| H | 2.44248700  | 1.11184600  | -2.43518500 |
| C | 0.61789500  | 3.54501400  | -0.03356900 |
| H | 0.65006700  | 1.94922200  | 1.41096000  |
| C | 0.95556900  | 3.95176500  | -1.32236200 |
| H | 1.87428700  | 3.39179400  | -3.18908300 |
| H | 0.11579200  | 4.23128100  | 0.64083000  |
| H | 0.71061900  | 4.95578400  | -1.65435000 |
| C | 2.31364800  | -1.42717600 | -1.14594200 |
| C | 3.24714300  | -2.45274700 | -0.94497200 |
| C | 1.54721100  | -1.39808500 | -2.31839300 |
| C | 3.40967900  | -3.44462200 | -1.90557000 |
| H | 3.85684200  | -2.47435000 | -0.04674500 |
| C | 1.72670500  | -2.39201400 | -3.27711900 |
| H | 0.80799300  | -0.62112400 | -2.48134700 |
| C | 2.65083700  | -3.41321700 | -3.07349700 |
| H | 4.13522300  | -4.23460800 | -1.74450000 |
| H | 1.13493300  | -2.36571200 | -4.18584100 |
| H | 2.78227100  | -4.18399000 | -3.82591600 |
| C | -1.05793400 | 0.35862600  | 2.27104400  |
| O | -0.38686900 | 1.04911600  | 3.06521800  |
| O | -2.42003800 | 0.50977600  | 2.25293400  |
| C | -2.93948300 | 1.34959300  | 3.26686100  |
| H | -2.57863600 | 2.37720100  | 3.15995500  |
| H | -4.02433500 | 1.32161500  | 3.15210800  |
| H | -2.66034600 | 0.99353500  | 4.26265000  |

TS2

|   |             |             |             |
|---|-------------|-------------|-------------|
| C | 1.67426500  | -1.76021700 | -0.10311300 |
| H | 1.29952800  | -2.62594600 | 0.44220100  |
| C | 0.70428300  | -1.20323500 | -0.96542700 |
| C | -0.73670100 | -1.60500500 | -0.88121800 |
| H | -1.16896000 | -1.82846100 | -1.86573300 |
| H | -0.85457700 | -2.50690300 | -0.26846400 |
| C | 1.06222000  | -0.41826500 | -2.08114100 |
| C | 3.08454100  | -1.97003100 | -0.55774500 |
| C | 3.65563300  | -3.23312700 | -0.37384800 |
| C | 3.85516700  | -0.96716300 | -1.15937800 |
| C | 4.95551300  | -3.50045300 | -0.79438500 |
| H | 3.07326900  | -4.01590900 | 0.10498100  |



|   |             |             |             |
|---|-------------|-------------|-------------|
| C | 5.15691900  | -1.23241900 | -1.57140800 |
| H | 3.43325100  | 0.02093400  | -1.29540800 |
| C | 5.71204600  | -2.49882500 | -1.39569100 |
| H | 5.37777200  | -4.48946900 | -0.64628500 |
| H | 5.74107400  | -0.44270200 | -2.03426300 |
| H | 6.72769100  | -2.70091100 | -1.72094400 |
| O | 1.99804500  | -0.96926000 | 1.46485300  |
| C | 2.35533500  | 0.26299200  | 1.59783800  |
| O | 2.80155400  | 0.74963900  | 2.62913000  |
| O | 2.12634800  | 1.00332000  | 0.47623300  |
| C | 2.48796000  | 2.40715600  | 0.42060000  |
| C | 1.70400300  | 3.21424400  | 1.45442800  |
| C | 3.99557200  | 2.57094700  | 0.59205300  |
| C | 2.05597800  | 2.81230500  | -0.98421300 |
| H | 0.62828000  | 3.07123200  | 1.30302200  |
| H | 1.97111300  | 2.92075200  | 2.46901000  |
| H | 1.92117100  | 4.27822800  | 1.31930800  |
| H | 4.52226800  | 1.92732800  | -0.11971200 |
| H | 4.27622500  | 3.60905400  | 0.39035000  |
| H | 4.30287700  | 2.30636300  | 1.60360700  |
| H | 2.22651800  | 3.88246200  | -1.13443000 |
| H | 2.60881100  | 2.25130400  | -1.74193200 |
| H | 0.99210300  | 2.59567500  | -1.12432700 |
| N | 1.30451200  | 0.19494800  | -3.04485200 |
| P | -1.94507800 | -0.40329100 | -0.13486800 |
| C | -3.61079400 | -0.97946400 | -0.54134400 |
| C | -4.58167100 | -0.08346600 | -0.99910800 |
| C | -3.91843700 | -2.33923700 | -0.40080500 |
| C | -5.85652700 | -0.54757200 | -1.30890200 |
| H | -4.34291700 | 0.96892600  | -1.11810300 |
| C | -5.19594000 | -2.79326800 | -0.70989100 |
| H | -3.17180100 | -3.04379200 | -0.04482600 |
| C | -6.16307600 | -1.89812200 | -1.16411900 |
| H | -6.60841100 | 0.14745400  | -1.66645800 |
| H | -5.43368800 | -3.84563300 | -0.59976900 |
| H | -7.15758400 | -2.25628700 | -1.40862700 |
| C | -1.73623000 | 1.24642000  | -0.83169600 |
| C | -1.87133100 | 2.38659100  | -0.03166800 |
| C | -1.53468300 | 1.37345200  | -2.21068300 |
| C | -1.78405800 | 3.64905100  | -0.61135400 |
| H | -2.04157000 | 2.29235700  | 1.03622200  |
| C | -1.44740600 | 2.63856400  | -2.78069100 |
| H | -1.42884900 | 0.49613700  | -2.84054800 |
| C | -1.56937500 | 3.77377300  | -1.98205700 |

|   |             |             |             |
|---|-------------|-------------|-------------|
| H | -1.87922800 | 4.53256800  | 0.01066500  |
| H | -1.27317200 | 2.73424700  | -3.84657600 |
| H | -1.49347700 | 4.75931300  | -2.42961000 |
| C | -1.75964100 | -0.32580400 | 1.65120200  |
| C | -2.67676100 | -0.93520300 | 2.51457800  |
| C | -0.62081500 | 0.30797500  | 2.15645900  |
| C | -2.44016200 | -0.90801500 | 3.88490000  |
| H | -3.56809100 | -1.41689200 | 2.12547000  |
| C | -0.38640600 | 0.32103800  | 3.52709900  |
| H | 0.06962100  | 0.79079800  | 1.47301700  |
| C | -1.29691000 | -0.28770400 | 4.38785300  |
| H | -3.15000400 | -1.37212000 | 4.56109000  |
| H | 0.51894000  | 0.78713600  | 3.90179200  |
| H | -1.11622600 | -0.27959600 | 5.45778600  |

TS2'

|   |             |             |             |
|---|-------------|-------------|-------------|
| C | 1.62128300  | -1.57924300 | 0.47099300  |
| H | 1.16305000  | -2.21599000 | 1.22735100  |
| C | 0.72212700  | -1.25074400 | -0.55700600 |
| C | -0.71159600 | -1.68247300 | -0.45119700 |
| H | -1.05999900 | -2.08800300 | -1.40830700 |
| H | -0.84258700 | -2.45509300 | 0.31525900  |
| C | 3.04135700  | -2.00619200 | 0.22249500  |
| C | 3.28613600  | -3.37987100 | 0.18436400  |
| C | 4.11206700  | -1.12778400 | 0.04006000  |
| C | 4.56912400  | -3.87293300 | -0.04939200 |
| H | 2.46194500  | -4.07278500 | 0.33587900  |
| C | 5.39273800  | -1.61653000 | -0.18766800 |
| H | 3.92100800  | -0.06091700 | 0.05595200  |
| C | 5.62815500  | -2.99119900 | -0.23456500 |
| H | 4.73802500  | -4.94496300 | -0.07680900 |
| H | 6.21419100  | -0.92017900 | -0.32714000 |
| H | 6.63066700  | -3.36918100 | -0.40924300 |
| O | 1.96426000  | -0.38708400 | 1.85196100  |
| C | 2.16856900  | 0.87389200  | 1.75005500  |
| O | 2.48422200  | 1.61583600  | 2.67685500  |
| O | 1.95383900  | 1.34386300  | 0.48427100  |
| C | 2.15610400  | 2.73968700  | 0.16016500  |
| C | 1.23142500  | 3.64241800  | 0.97640800  |
| C | 3.62265400  | 3.11722800  | 0.34927800  |
| C | 1.77156200  | 2.80144600  | -1.31473000 |
| H | 0.18948400  | 3.33791500  | 0.83364900  |
| H | 1.47938100  | 3.60317200  | 2.03630500  |
| H | 1.32892600  | 4.67273900  | 0.62010100  |

|   |             |             |             |
|---|-------------|-------------|-------------|
| H | 4.25848200  | 2.43657100  | -0.22622300 |
| H | 3.79200800  | 4.13419700  | -0.01754200 |
| H | 3.90036300  | 3.06420100  | 1.40212600  |
| H | 1.80313800  | 3.83428100  | -1.67364100 |
| H | 2.45838600  | 2.19292700  | -1.90713000 |
| H | 0.75819300  | 2.40846200  | -1.45174900 |
| P | -2.00444100 | -0.43392400 | 0.00315400  |
| C | -3.61751700 | -1.17881100 | -0.34512500 |
| C | -4.65819000 | -0.40636000 | -0.86970200 |
| C | -3.81917900 | -2.53818000 | -0.07417100 |
| C | -5.89463300 | -0.99397300 | -1.12066600 |
| H | -4.50179400 | 0.64584100  | -1.08673100 |
| C | -5.05825400 | -3.11695600 | -0.32741700 |
| H | -3.01933600 | -3.14741500 | 0.33620200  |
| C | -6.09369100 | -2.34574200 | -0.85138900 |
| H | -6.70072800 | -0.39485900 | -1.53012200 |
| H | -5.21289100 | -4.16989400 | -0.11866100 |
| H | -7.05828900 | -2.80089300 | -1.05041700 |
| C | -1.89388700 | 1.09989100  | -0.94213000 |
| C | -2.09235400 | 2.34221400  | -0.32930400 |
| C | -1.71609000 | 1.01651600  | -2.32837600 |
| C | -2.08355400 | 3.50049700  | -1.10247700 |
| H | -2.25117400 | 2.41055100  | 0.74222100  |
| C | -1.71029600 | 2.17997000  | -3.09042700 |
| H | -1.54565700 | 0.05603800  | -2.80145700 |
| C | -1.88920500 | 3.41958000  | -2.47902600 |
| H | -2.22638300 | 4.46404500  | -0.62510500 |
| H | -1.55959700 | 2.11569400  | -4.16259900 |
| H | -1.87896100 | 4.32474400  | -3.07739100 |
| C | -1.90860400 | -0.05309000 | 1.75852100  |
| C | -2.83669400 | -0.55900100 | 2.67473200  |
| C | -0.82502100 | 0.71486700  | 2.19388800  |
| C | -2.66813000 | -0.28957800 | 4.02930200  |
| H | -3.68180800 | -1.15089200 | 2.33747700  |
| C | -0.65888500 | 0.97284100  | 3.55022600  |
| H | -0.12419400 | 1.10908000  | 1.46547700  |
| C | -1.58214100 | 0.46943100  | 4.46461100  |
| H | -3.38551500 | -0.67491600 | 4.74584800  |
| H | 0.20494500  | 1.54524800  | 3.87236000  |
| H | -1.45482400 | 0.66734800  | 5.52398100  |
| C | 1.10752100  | -0.83876300 | -1.88593000 |
| O | 0.39455300  | -0.93329200 | -2.88599900 |
| O | 2.36356000  | -0.35769500 | -1.98757500 |
| C | 2.81411100  | -0.09891900 | -3.30932900 |

|    |             |             |             |
|----|-------------|-------------|-------------|
| H  | 3.84268000  | 0.24859100  | -3.20742700 |
| H  | 2.78042300  | -1.00416300 | -3.92033900 |
| H  | 2.19950900  | 0.66953600  | -3.78601100 |
| M2 |             |             |             |
| C  | -0.80290000 | -3.05651800 | 0.13802400  |
| H  | -0.30733400 | -3.55824800 | -0.69304000 |
| C  | 0.00017500  | -2.38595700 | 0.98822300  |
| C  | 1.47930900  | -2.25021600 | 0.72754800  |
| H  | 2.07515900  | -2.40120100 | 1.63400600  |
| H  | 1.79180600  | -2.98467800 | -0.01945700 |
| C  | -0.48153800 | -1.78654900 | 2.20462400  |
| C  | -2.25998000 | -3.20410400 | 0.19286900  |
| C  | -2.82321100 | -4.40107400 | -0.27492000 |
| C  | -3.09634800 | -2.17089900 | 0.63934400  |
| C  | -4.19890900 | -4.58685300 | -0.25116700 |
| H  | -2.17295500 | -5.18840000 | -0.64669500 |
| C  | -4.47571100 | -2.35988200 | 0.63907900  |
| H  | -2.69590200 | -1.19870000 | 0.93073900  |
| C  | -5.02823500 | -3.56398700 | 0.20948800  |
| H  | -4.62522400 | -5.52097400 | -0.60213600 |
| H  | -5.11841500 | -1.54819000 | 0.96365500  |
| H  | -6.10493500 | -3.70147400 | 0.21484200  |
| O  | -2.21734300 | 0.84414900  | 1.10497600  |
| C  | -2.59593700 | 1.61376200  | 0.19681800  |
| O  | -3.38496900 | 1.41506100  | -0.74179600 |
| O  | -1.96954300 | 2.87345700  | 0.29920400  |
| C  | -2.16292500 | 3.89850600  | -0.68488500 |
| C  | -1.70108400 | 3.43167200  | -2.06565600 |
| C  | -3.61596500 | 4.37093300  | -0.71005400 |
| C  | -1.25653700 | 5.02686400  | -0.19390800 |
| H  | -0.68184200 | 3.03283700  | -2.00085200 |
| H  | -2.35885500 | 2.64826400  | -2.44089500 |
| H  | -1.69760900 | 4.27437000  | -2.76496200 |
| H  | -3.92059500 | 4.68024100  | 0.29458000  |
| H  | -3.71990800 | 5.22955000  | -1.38156800 |
| H  | -4.26573400 | 3.56395100  | -1.04642900 |
| H  | -1.30581000 | 5.88628600  | -0.86908700 |
| H  | -1.56362100 | 5.34923800  | 0.80566400  |
| H  | -0.21929200 | 4.67996600  | -0.14185500 |
| N  | -0.78429500 | -1.33999800 | 3.22938000  |
| P  | 1.92851700  | -0.58468200 | 0.07309300  |
| C  | 3.69315700  | -0.61312200 | -0.30405800 |
| C  | 4.47203200  | 0.51482000  | -0.02409700 |

|     |             |             |             |
|-----|-------------|-------------|-------------|
| C   | 4.26934800  | -1.73655200 | -0.91000900 |
| C   | 5.82607200  | 0.51228600  | -0.34433100 |
| H   | 4.02499400  | 1.38482500  | 0.44659100  |
| C   | 5.62342600  | -1.72913800 | -1.22562900 |
| H   | 3.67352400  | -2.61251900 | -1.14787400 |
| C   | 6.40012600  | -0.60726900 | -0.94106000 |
| H   | 6.43057600  | 1.38502900  | -0.12359000 |
| H   | 6.07131600  | -2.59941800 | -1.69236000 |
| H   | 7.45688900  | -0.60685000 | -1.18641900 |
| C   | 1.62115000  | 0.61307900  | 1.37414500  |
| C   | 0.66094100  | 1.61276600  | 1.23387500  |
| C   | 2.32750000  | 0.45945900  | 2.58007800  |
| C   | 0.38984300  | 2.45542200  | 2.31111500  |
| H   | 0.09218500  | 1.74520900  | 0.32193900  |
| C   | 2.06354000  | 1.31622100  | 3.63626800  |
| H   | 3.08230000  | -0.31547500 | 2.68960300  |
| C   | 1.08747200  | 2.30942100  | 3.50212100  |
| H   | -0.39267100 | 3.19552600  | 2.18934100  |
| H   | 2.60565400  | 1.20514700  | 4.56898800  |
| H   | 0.87064200  | 2.96312700  | 4.34076900  |
| C   | 0.97297000  | -0.27921100 | -1.41796600 |
| C   | 1.61505900  | -0.21514300 | -2.66114700 |
| C   | -0.42263600 | -0.16354900 | -1.32779100 |
| C   | 0.85352200  | -0.04666100 | -3.81280100 |
| H   | 2.69538500  | -0.29160400 | -2.73175600 |
| C   | -1.17160100 | 0.00333300  | -2.48897600 |
| H   | -0.93360800 | -0.16292200 | -0.36673100 |
| C   | -0.53400200 | 0.05642400  | -3.72668900 |
| H   | 1.34686800  | 0.00872800  | -4.77723900 |
| H   | -2.24502200 | 0.12580400  | -2.38915400 |
| H   | -1.11955500 | 0.19172500  | -4.63058800 |
| M2' |             |             |             |
| C   | -0.61149200 | -2.84423000 | 0.47251600  |
| H   | 0.02549400  | -3.43545000 | -0.18904100 |
| C   | 0.04854000  | -2.01511600 | 1.30524300  |
| C   | 1.54180400  | -1.86659800 | 1.16085000  |
| H   | 2.03194100  | -1.69836300 | 2.12431500  |
| H   | 1.96317000  | -2.75890700 | 0.69217600  |
| C   | -2.04760000 | -3.05933800 | 0.22729100  |
| C   | -2.46890000 | -4.34529300 | -0.13802700 |
| C   | -2.96984400 | -2.00355300 | 0.20560900  |
| C   | -3.79727700 | -4.58792800 | -0.46945500 |
| H   | -1.74839200 | -5.15925400 | -0.15619800 |

|   |             |             |             |
|---|-------------|-------------|-------------|
| C | -4.28857400 | -2.24600800 | -0.16263000 |
| H | -2.66522100 | -0.99070600 | 0.45943000  |
| C | -4.71020300 | -3.53468500 | -0.48648800 |
| H | -4.11464600 | -5.59194000 | -0.73240100 |
| H | -4.97810100 | -1.40906900 | -0.20630400 |
| H | -5.74320300 | -3.71741100 | -0.76661300 |
| O | -2.01656300 | 0.97692600  | 1.04518500  |
| C | -2.52435900 | 1.55536400  | 0.05800100  |
| O | -3.35378800 | 1.12800400  | -0.76274600 |
| O | -2.00825200 | 2.85072800  | -0.10435400 |
| C | -2.39825100 | 3.68620600  | -1.20545200 |
| C | -2.02275500 | 3.04963600  | -2.54359100 |
| C | -3.88883500 | 4.01681100  | -1.14125500 |
| C | -1.57081200 | 4.95220200  | -0.99000100 |
| H | -0.97123200 | 2.74141100  | -2.52483100 |
| H | -2.64088400 | 2.17396900  | -2.73838400 |
| H | -2.15473400 | 3.77615700  | -3.35212400 |
| H | -4.12838700 | 4.46296100  | -0.17095200 |
| H | -4.14662000 | 4.73704800  | -1.92453000 |
| H | -4.47835200 | 3.10977900  | -1.27269500 |
| H | -1.77855000 | 5.68836600  | -1.77198700 |
| H | -1.80660300 | 5.39703200  | -0.01850900 |
| H | -0.50300100 | 4.71092700  | -1.00999300 |
| P | 2.04178300  | -0.44128100 | 0.09750500  |
| C | 3.78775400  | -0.65422800 | -0.33048900 |
| C | 4.57178300  | 0.48410500  | -0.55477100 |
| C | 4.33651700  | -1.92781900 | -0.51674600 |
| C | 5.89824100  | 0.34429600  | -0.94841300 |
| H | 4.14888300  | 1.47411700  | -0.41564400 |
| C | 5.66576000  | -2.05874700 | -0.90662600 |
| H | 3.74194300  | -2.82302000 | -0.36931700 |
| C | 6.44591200  | -0.92516300 | -1.11948500 |
| H | 6.50290400  | 1.22816200  | -1.11983200 |
| H | 6.08988800  | -3.04740400 | -1.04311500 |
| H | 7.48240200  | -1.03102600 | -1.42202100 |
| C | 1.89269100  | 1.09192900  | 1.02486100  |
| C | 0.85923700  | 1.99811900  | 0.79696200  |
| C | 2.79609500  | 1.28775800  | 2.08053200  |
| C | 0.72341000  | 3.10139700  | 1.63764900  |
| H | 0.13357600  | 1.86378200  | 0.00470000  |
| C | 2.66406800  | 2.39993400  | 2.89690600  |
| H | 3.59967600  | 0.57830500  | 2.26123400  |
| C | 1.62086400  | 3.30329300  | 2.67882000  |
| H | -0.11111100 | 3.77324000  | 1.46638900  |

|   |             |             |             |
|---|-------------|-------------|-------------|
| H | 3.36521200  | 2.55815800  | 3.70919500  |
| H | 1.51059900  | 4.16345100  | 3.33161400  |
| C | 1.07024200  | -0.45451500 | -1.41964300 |
| C | 1.69448100  | -0.69003300 | -2.65129000 |
| C | -0.32005900 | -0.28607800 | -1.34855500 |
| C | 0.92102500  | -0.75896800 | -3.80570300 |
| H | 2.77055700  | -0.81822500 | -2.71147000 |
| C | -1.08325300 | -0.36286100 | -2.50985300 |
| H | -0.81410200 | -0.08732000 | -0.40058300 |
| C | -0.46232300 | -0.60040700 | -3.73421700 |
| H | 1.40144500  | -0.93755200 | -4.76171400 |
| H | -2.15581500 | -0.21911100 | -2.42464200 |
| H | -1.05745000 | -0.65851200 | -4.64006100 |
| C | -0.53168700 | -1.18690400 | 2.40499300  |
| O | 0.12216900  | -0.34755400 | 2.98791800  |
| O | -1.77197100 | -1.52680700 | 2.73259700  |
| C | -2.41441800 | -0.65146000 | 3.66522900  |
| H | -1.87762800 | -0.65124900 | 4.61618700  |
| H | -2.44088200 | 0.35076900  | 3.23698900  |
| H | -3.41896500 | -1.05099000 | 3.79272700  |

TS3

|   |             |             |             |
|---|-------------|-------------|-------------|
| C | 2.45011900  | -0.33222100 | -1.03348000 |
| H | 2.38639000  | 0.46065500  | -1.77805100 |
| C | 1.31335000  | -0.60706500 | -0.35868400 |
| C | 0.05061800  | 0.14475700  | -0.61494000 |
| H | 0.33798300  | 1.43905900  | -0.05125800 |
| H | -0.05156100 | 0.40001500  | -1.67514300 |
| C | 1.33279100  | -1.55750400 | 0.72820700  |
| C | 3.78361300  | -0.91689700 | -0.83530800 |
| C | 4.90028500  | -0.07722400 | -0.95134100 |
| C | 3.98474500  | -2.27750200 | -0.56978900 |
| C | 6.18440700  | -0.58100500 | -0.78098600 |
| H | 4.74325900  | 0.98017900  | -1.14432400 |
| C | 5.27130600  | -2.77960800 | -0.40328300 |
| H | 3.13331500  | -2.94791400 | -0.51295600 |
| C | 6.37372800  | -1.93447700 | -0.50589800 |
| H | 7.03889000  | 0.08339100  | -0.86063600 |
| H | 5.41306700  | -3.83664900 | -0.20217400 |
| H | 7.37613900  | -2.33005700 | -0.37751600 |
| O | 1.97043600  | 1.27776900  | 1.98329200  |
| C | 2.27656700  | 2.00487700  | 1.07467800  |
| O | 3.21543600  | 2.50346800  | 0.50593500  |

|   |             |             |             |
|---|-------------|-------------|-------------|
| O | 0.81646900  | 2.45124500  | 0.35249700  |
| C | 0.71731100  | 3.56296700  | -0.56618700 |
| C | 1.27366700  | 4.80209800  | 0.13069000  |
| C | 1.46869900  | 3.27103400  | -1.86506400 |
| C | -0.77336800 | 3.75044800  | -0.84484300 |
| H | 0.75774500  | 4.95306300  | 1.08351200  |
| H | 2.34239300  | 4.69425400  | 0.31817700  |
| H | 1.10874100  | 5.68367700  | -0.49582500 |
| H | 1.02619700  | 2.41148600  | -2.37983200 |
| H | 1.39798800  | 4.13238500  | -2.53627800 |
| H | 2.51932300  | 3.06513200  | -1.65722700 |
| H | -0.92683700 | 4.62042600  | -1.49066200 |
| H | -1.19516600 | 2.87419300  | -1.34800300 |
| H | -1.31801500 | 3.90704800  | 0.09055300  |
| N | 1.28008200  | -2.34110000 | 1.58026000  |
| P | -1.50673000 | -0.48396500 | -0.08117000 |
| C | -2.74454700 | 0.73489300  | -0.59478600 |
| C | -3.32139000 | 1.60933200  | 0.32711500  |
| C | -3.05198800 | 0.83991500  | -1.95682300 |
| C | -4.19523700 | 2.59928300  | -0.11701800 |
| H | -3.08524800 | 1.52502100  | 1.38330900  |
| C | -3.91927100 | 1.83456300  | -2.39293800 |
| H | -2.61893400 | 0.14574100  | -2.67254700 |
| C | -4.48714300 | 2.71619900  | -1.47281600 |
| H | -4.64239100 | 3.28114000  | 0.59835500  |
| H | -4.15479300 | 1.92056500  | -3.44825100 |
| H | -5.16413600 | 3.49168300  | -1.81581300 |
| C | -1.56143700 | -0.66595200 | 1.71383400  |
| C | -2.20825000 | -1.75236300 | 2.31005000  |
| C | -0.92564100 | 0.30249300  | 2.49939200  |
| C | -2.22253500 | -1.86531300 | 3.69612600  |
| H | -2.68077800 | -2.51619800 | 1.70125900  |
| C | -0.94358300 | 0.17573800  | 3.88452800  |
| H | -0.38831500 | 1.12832300  | 2.04280900  |
| C | -1.59023700 | -0.90403100 | 4.48147700  |
| H | -2.71630500 | -2.71152100 | 4.16145400  |
| H | -0.43537700 | 0.91565900  | 4.49328000  |
| H | -1.59305300 | -1.00300700 | 5.56213000  |
| C | -2.02339200 | -2.04898200 | -0.84364400 |
| C | -3.37750500 | -2.40735500 | -0.87345900 |
| C | -1.06256600 | -2.89395200 | -1.40489200 |
| C | -3.76009600 | -3.61474100 | -1.44650200 |
| H | -4.12870200 | -1.74158500 | -0.45608200 |
| C | -1.45344000 | -4.10094800 | -1.97924100 |



|   |             |             |             |
|---|-------------|-------------|-------------|
| H | -0.01478100 | -2.60873200 | -1.40775700 |
| C | -2.79784200 | -4.46133900 | -1.99633700 |
| H | -4.80833400 | -3.89287900 | -1.46893600 |
| H | -0.70723400 | -4.75616100 | -2.41527400 |
| H | -3.10026100 | -5.40178900 | -2.44536700 |

M3

|   |             |             |             |
|---|-------------|-------------|-------------|
| C | -2.08831400 | 0.16908400  | -0.50587500 |
| C | -1.30336200 | -0.22822700 | -1.55351400 |
| C | 0.12930600  | -0.30532200 | -1.60965300 |
| C | -1.92687600 | -0.72195500 | -2.76520700 |
| C | -3.54493600 | 0.16018900  | -0.37295700 |
| C | -4.08231700 | 0.04471600  | 0.92260800  |
| C | -4.44679800 | 0.29440300  | -1.44304400 |
| C | -5.45418200 | 0.03305400  | 1.13939600  |
| H | -3.39971400 | -0.05170700 | 1.76371300  |
| C | -5.82014300 | 0.27693400  | -1.22361000 |
| H | -4.07542600 | 0.43211700  | -2.45178000 |
| C | -6.33460500 | 0.14306600  | 0.06430100  |
| H | -5.83824100 | -0.06440400 | 2.15033200  |
| H | -6.49444000 | 0.38214800  | -2.06817200 |
| H | -7.40708400 | 0.13410100  | 0.22910100  |
| N | -2.36547200 | -1.13267800 | -3.75553400 |
| P | 1.15846700  | -0.06143500 | -0.26835800 |
| C | 0.56570800  | -0.93857100 | 1.21927500  |
| C | 0.73430700  | -0.43379100 | 2.51129300  |
| C | -0.10392500 | -2.15213700 | 1.02533300  |
| C | 0.25165200  | -1.15054700 | 3.60357700  |
| H | 1.22527900  | 0.52083900  | 2.66905200  |
| C | -0.58479400 | -2.86277000 | 2.11990600  |
| H | -0.25653600 | -2.52054800 | 0.01436400  |
| C | -0.40602300 | -2.36251200 | 3.40870800  |
| H | 0.38301100  | -0.75589200 | 4.60556800  |
| H | -1.10708200 | -3.80103500 | 1.96612100  |
| H | -0.78677500 | -2.91481000 | 4.26187100  |
| C | 1.41951900  | 1.67203200  | 0.24530000  |
| C | 2.52777600  | 2.05053600  | 1.01232800  |
| C | 0.49636800  | 2.63412400  | -0.17175400 |
| C | 2.69656200  | 3.38278900  | 1.37562900  |
| H | 3.26342200  | 1.30862400  | 1.31406500  |
| C | 0.66759700  | 3.96564500  | 0.19916500  |
| H | -0.34567600 | 2.33682600  | -0.79135800 |
| C | 1.76443800  | 4.33823400  | 0.97271500  |

|   |             |             |             |
|---|-------------|-------------|-------------|
| H | 3.55836500  | 3.67650000  | 1.96568300  |
| H | -0.05031800 | 4.71201300  | -0.12426600 |
| H | 1.90009100  | 5.37735900  | 1.25476000  |
| C | 2.80933500  | -0.67576900 | -0.69529800 |
| C | 3.26882800  | -1.90555600 | -0.21926300 |
| C | 3.60174200  | 0.08501100  | -1.56209300 |
| C | 4.51879300  | -2.37426600 | -0.61567000 |
| H | 2.65498900  | -2.49346500 | 0.45657300  |
| C | 4.84613200  | -0.39263300 | -1.95883100 |
| H | 3.24855200  | 1.04798900  | -1.92065700 |
| C | 5.30397000  | -1.62118600 | -1.48512800 |
| H | 4.87833200  | -3.32793800 | -0.24425700 |
| H | 5.45948800  | 0.19546600  | -2.63311000 |
| H | 6.27662900  | -1.99047300 | -1.79339100 |
| H | 0.62209100  | -0.57813000 | -2.53236000 |
| H | -1.56220500 | 0.47723300  | 0.39642400  |

TS4a

|   |             |             |             |
|---|-------------|-------------|-------------|
| C | 1.80388000  | 0.45699200  | -0.00453800 |
| C | 0.98826800  | 0.59532800  | -1.08923400 |
| C | -0.33721600 | -0.01636800 | -1.21189800 |
| C | 1.42705000  | 1.28859200  | -2.27591400 |
| C | 3.16458000  | 0.93479900  | 0.24148800  |
| C | 3.61953800  | 0.87402000  | 1.57071000  |
| C | 4.05659900  | 1.38202400  | -0.74778500 |
| C | 4.90351900  | 1.27909300  | 1.90976600  |
| H | 2.94777700  | 0.49150500  | 2.33594500  |
| C | 5.34368300  | 1.78287000  | -0.40365400 |
| H | 3.75916500  | 1.40694200  | -1.78914700 |
| C | 5.77126500  | 1.74159500  | 0.92172700  |
| H | 5.23045600  | 1.22629500  | 2.94325500  |
| H | 6.01992600  | 2.12523900  | -1.18062100 |
| H | 6.77694500  | 2.05619400  | 1.18108100  |
| N | 1.68792300  | 1.87825600  | -3.24033500 |
| P | -1.58459600 | 0.47092700  | -0.04683500 |
| C | -0.89932500 | 0.76451400  | 1.59750600  |
| C | -0.36475700 | 2.02848600  | 1.87113100  |
| C | -0.73966100 | -0.28293700 | 2.51219800  |
| C | 0.33957300  | 2.23879000  | 3.05156100  |
| H | -0.48342800 | 2.83905200  | 1.15807400  |
| C | -0.02922100 | -0.06398600 | 3.68914600  |
| H | -1.16422100 | -1.26135000 | 2.31029700  |
| C | 0.51205600  | 1.19216300  | 3.95586400  |

|   |             |             |             |
|---|-------------|-------------|-------------|
| H | 0.76015000  | 3.21660100  | 3.25978600  |
| H | 0.10712200  | -0.87892300 | 4.39121200  |
| H | 1.07004700  | 1.35607100  | 4.87207700  |
| C | -2.38243500 | 2.03374100  | -0.55307200 |
| C | -3.60876200 | 2.40208800  | 0.01252400  |
| C | -1.75544900 | 2.87674000  | -1.47395100 |
| C | -4.19720700 | 3.61131600  | -0.33780700 |
| H | -4.10767700 | 1.74380300  | 0.71800100  |
| C | -2.35165700 | 4.08744000  | -1.82087800 |
| H | -0.80754100 | 2.59662900  | -1.92404000 |
| C | -3.56833900 | 4.45400800  | -1.25386800 |
| H | -5.14826000 | 3.89455000  | 0.10055900  |
| H | -1.86332900 | 4.73996300  | -2.53660500 |
| H | -4.03157600 | 5.39630600  | -1.52773300 |
| C | -2.91110700 | -0.75183800 | 0.04657100  |
| C | -3.66416900 | -0.90932200 | 1.21322600  |
| C | -3.22754500 | -1.49294000 | -1.09709600 |
| C | -4.71531700 | -1.82048500 | 1.23973200  |
| H | -3.42598500 | -0.33470100 | 2.10354600  |
| C | -4.27645200 | -2.40440900 | -1.06192700 |
| H | -2.65944500 | -1.36151900 | -2.01438400 |
| C | -5.01598800 | -2.57117200 | 0.10701000  |
| H | -5.29135900 | -1.94911000 | 2.14965200  |
| H | -4.51617700 | -2.98436300 | -1.94653100 |
| H | -5.83033000 | -3.28764700 | 0.13370000  |
| H | -0.76154900 | 0.08406500  | -2.21188800 |
| H | 1.36651200  | -0.06680400 | 0.84239600  |
| C | 2.78053600  | -1.77230900 | -3.25271100 |
| C | 1.47733500  | -2.02409200 | -3.70404000 |
| C | 0.34212100  | -2.27191900 | -2.95596900 |
| C | 3.23755900  | -1.83084500 | -1.94526200 |
| C | 0.15699500  | -2.23331500 | -1.55628300 |
| C | 2.54825700  | -2.12079500 | -0.76602500 |
| H | 3.52151400  | -1.54994900 | -4.01487300 |
| H | 1.34045700  | -2.02502700 | -4.78254400 |
| H | -0.57076500 | -2.43699300 | -3.52469000 |
| H | 4.30007300  | -1.64418400 | -1.80789000 |
| H | -0.83000500 | -2.54299000 | -1.22690300 |
| H | 3.17427800  | -2.18228300 | 0.12156800  |
| C | 1.18370900  | -2.39968500 | -0.54887700 |
| C | 0.74539100  | -2.75682900 | 0.75505900  |
| C | -0.56930800 | -3.21905200 | 1.00722700  |
| N | -1.64933600 | -3.59689100 | 1.22587000  |
| C | 1.61047300  | -2.68570300 | 1.87607200  |

|       |             |             |             |
|-------|-------------|-------------|-------------|
| N     | 2.31788800  | -2.58291600 | 2.79487200  |
| TS4a' |             |             |             |
| C     | -1.80388000 | 0.45699200  | -0.00453800 |
| C     | -0.98826800 | 0.59532800  | -1.08923400 |
| C     | 0.33721600  | -0.01636800 | -1.21189800 |
| C     | -1.42705000 | 1.28859200  | -2.27591400 |
| C     | -3.16458000 | 0.93479900  | 0.24148800  |
| C     | -3.61953800 | 0.87402000  | 1.57071000  |
| C     | -4.05659900 | 1.38202400  | -0.74778500 |
| C     | -4.90351900 | 1.27909300  | 1.90976600  |
| H     | -2.94777700 | 0.49150500  | 2.33594500  |
| C     | -5.34368300 | 1.78287000  | -0.40365400 |
| H     | -3.75916500 | 1.40694200  | -1.78914700 |
| C     | -5.77126500 | 1.74159500  | 0.92172700  |
| H     | -5.23045600 | 1.22629500  | 2.94325500  |
| H     | -6.01992600 | 2.12523900  | -1.18062100 |
| H     | -6.77694500 | 2.05619400  | 1.18108100  |
| N     | -1.68792300 | 1.87825600  | -3.24033500 |
| P     | 1.58459600  | 0.47092700  | -0.04683500 |
| C     | 0.89932500  | 0.76451400  | 1.59750600  |
| C     | 0.36475700  | 2.02848600  | 1.87113100  |
| C     | 0.73966100  | -0.28293700 | 2.51219800  |
| C     | -0.33957300 | 2.23879000  | 3.05156100  |
| H     | 0.48342800  | 2.83905200  | 1.15807400  |
| C     | 0.02922100  | -0.06398600 | 3.68914600  |
| H     | 1.16422100  | -1.26135000 | 2.31029700  |
| C     | -0.51205600 | 1.19216300  | 3.95586400  |
| H     | -0.76015000 | 3.21660100  | 3.25978600  |
| H     | -0.10712200 | -0.87892300 | 4.39121200  |
| H     | -1.07004700 | 1.35607100  | 4.87207700  |
| C     | 2.38243500  | 2.03374100  | -0.55307200 |
| C     | 3.60876200  | 2.40208800  | 0.01252400  |
| C     | 1.75544900  | 2.87674000  | -1.47395100 |
| C     | 4.19720700  | 3.61131600  | -0.33780700 |
| H     | 4.10767700  | 1.74380300  | 0.71800100  |
| C     | 2.35165700  | 4.08744000  | -1.82087800 |
| H     | 0.80754100  | 2.59662900  | -1.92404000 |
| C     | 3.56833900  | 4.45400800  | -1.25386800 |
| H     | 5.14826000  | 3.89455000  | 0.10055900  |
| H     | 1.86332900  | 4.73996300  | -2.53660500 |
| H     | 4.03157600  | 5.39630600  | -1.52773300 |
| C     | 2.91110700  | -0.75183800 | 0.04657100  |

|   |             |             |             |
|---|-------------|-------------|-------------|
| C | 3.66416900  | -0.90932200 | 1.21322600  |
| C | 3.22754500  | -1.49294000 | -1.09709600 |
| C | 4.71531700  | -1.82048500 | 1.23973200  |
| H | 3.42598500  | -0.33470100 | 2.10354600  |
| C | 4.27645200  | -2.40440900 | -1.06192700 |
| H | 2.65944500  | -1.36151900 | -2.01438400 |
| C | 5.01598800  | -2.57117200 | 0.10701000  |
| H | 5.29135900  | -1.94911000 | 2.14965200  |
| H | 4.51617700  | -2.98436300 | -1.94653100 |
| H | 5.83033000  | -3.28764700 | 0.13370000  |
| H | 0.76154900  | 0.08406500  | -2.21188800 |
| H | -1.36651200 | -0.06680400 | 0.84239600  |
| C | -2.78053600 | -1.77230900 | -3.25271100 |
| C | -1.47733500 | -2.02409200 | -3.70404000 |
| C | -0.34212100 | -2.27191900 | -2.95596900 |
| C | -3.23755900 | -1.83084500 | -1.94526200 |
| C | -0.15699500 | -2.23331500 | -1.55628300 |
| C | -2.54825700 | -2.12079500 | -0.76602500 |
| H | -3.52151400 | -1.54994900 | -4.01487300 |
| H | -1.34045700 | -2.02502700 | -4.78254400 |
| H | 0.57076500  | -2.43699300 | -3.52469000 |
| H | -4.30007300 | -1.64418400 | -1.80789000 |
| H | 0.83000500  | -2.54299000 | -1.22690300 |
| H | -3.17427800 | -2.18228300 | 0.12156800  |
| C | -1.18370900 | -2.39968500 | -0.54887700 |
| C | -0.74539100 | -2.75682900 | 0.75505900  |
| C | 0.56930800  | -3.21905200 | 1.00722700  |
| N | 1.64933600  | -3.59689100 | 1.22587000  |
| C | -1.61047300 | -2.68570300 | 1.87607200  |
| N | -2.31788800 | -2.58291600 | 2.79487200  |

TS4 $\gamma$

|   |             |             |             |
|---|-------------|-------------|-------------|
| C | -1.84603300 | -0.28332500 | -0.18864200 |
| C | -1.01724500 | -0.39129700 | -1.32894400 |
| C | 0.35574600  | -0.16916800 | -1.40654300 |
| C | -1.62115300 | -0.65713200 | -2.61938900 |
| C | -3.14463400 | -0.94981900 | 0.03736200  |
| C | -3.44517300 | -1.30578500 | 1.36312900  |
| C | -4.12110600 | -1.17368400 | -0.94609000 |
| C | -4.65992700 | -1.89451300 | 1.69195200  |
| H | -2.70914900 | -1.10662700 | 2.13937700  |
| C | -5.33648700 | -1.76573700 | -0.61188700 |
| H | -3.94613600 | -0.87937700 | -1.97366500 |
| C | -5.61150200 | -2.13449500 | 0.70225500  |

|   |             |             |             |
|---|-------------|-------------|-------------|
| H | -4.86470200 | -2.16304700 | 2.72364100  |
| H | -6.07667100 | -1.93253100 | -1.38831300 |
| H | -6.56101400 | -2.59566100 | 0.95412100  |
| N | -2.05214000 | -0.90865000 | -3.66490300 |
| P | 1.57555100  | -0.54291900 | -0.19604800 |
| C | 2.68143500  | 0.83752300  | 0.17209100  |
| C | 3.45936500  | 0.85391200  | 1.33574900  |
| C | 2.84352000  | 1.83437900  | -0.79451200 |
| C | 4.37600400  | 1.87984500  | 1.53683300  |
| H | 3.34996900  | 0.07452400  | 2.08437800  |
| C | 3.76557100  | 2.85459200  | -0.58679400 |
| H | 2.24538300  | 1.81583300  | -1.70063700 |
| C | 4.52594500  | 2.87985100  | 0.57918000  |
| H | 4.96892500  | 1.89952000  | 2.44460200  |
| H | 3.88645000  | 3.63088300  | -1.33467800 |
| H | 5.23874400  | 3.68114400  | 0.74273700  |
| C | 0.87505100  | -1.20412300 | 1.33379500  |
| C | 0.40119200  | -2.52157900 | 1.32202500  |
| C | 0.71451200  | -0.40558200 | 2.46990200  |
| C | -0.23383100 | -3.03469400 | 2.44646600  |
| H | 0.52365300  | -3.14211100 | 0.43917100  |
| C | 0.08023600  | -0.93032000 | 3.59305400  |
| H | 1.06631100  | 0.62168400  | 2.47799300  |
| C | -0.39169600 | -2.24017900 | 3.58136000  |
| H | -0.60575900 | -4.05333900 | 2.43572000  |
| H | -0.05887800 | -0.30449000 | 4.46719800  |
| H | -0.88971500 | -2.64232300 | 4.45752900  |
| C | 2.62099600  | -1.85105400 | -0.92032300 |
| C | 3.96461100  | -1.97251200 | -0.55178200 |
| C | 2.05589100  | -2.76556200 | -1.81645300 |
| C | 4.73286200  | -3.00998300 | -1.06934200 |
| H | 4.41543000  | -1.25633200 | 0.12759300  |
| C | 2.83089400  | -3.80185300 | -2.32863500 |
| H | 1.01711800  | -2.66376700 | -2.11811700 |
| C | 4.16676200  | -3.92478400 | -1.95481200 |
| H | 5.77563000  | -3.09936800 | -0.78451100 |
| H | 2.39135800  | -4.50846500 | -3.02427300 |
| H | 4.76999600  | -4.73111400 | -2.35889700 |
| H | 0.79189400  | -0.09023100 | -2.39926200 |
| H | -1.29236200 | -0.13821600 | 0.73487100  |
| C | -2.99040500 | 2.39682900  | -2.67345000 |
| C | -1.75204200 | 2.83042900  | -3.18038500 |
| C | -0.59675600 | 3.06937600  | -2.45774000 |
| C | -3.29183300 | 1.98409800  | -1.39541700 |

|   |             |            |             |
|---|-------------|------------|-------------|
| C | -0.33476100 | 2.93042300 | -1.09014400 |
| C | -2.42654700 | 1.76807000 | -0.28521000 |
| H | -3.81851100 | 2.39646200 | -3.37840400 |
| H | -1.71523400 | 3.05438400 | -4.24215000 |
| H | 0.23958000  | 3.46351200 | -3.03255100 |
| H | -4.32779700 | 1.71419400 | -1.20994100 |
| H | 0.62607800  | 3.31808300 | -0.76131300 |
| H | -2.97545100 | 1.57632900 | 0.63372900  |
| C | -1.14814900 | 2.42728400 | -0.05980900 |
| C | -0.69074000 | 2.48839300 | 1.28676500  |
| C | 0.52207700  | 3.13043600 | 1.64427100  |
| N | 1.51695400  | 3.65031500 | 1.95258200  |
| C | -1.45061800 | 1.96240100 | 2.35985900  |
| N | -2.07489600 | 1.50980300 | 3.23322200  |

TS4γ'

|   |             |             |             |
|---|-------------|-------------|-------------|
| C | 1.84621300  | -0.28309700 | -0.18903200 |
| C | 1.01741400  | -0.39025000 | -1.32941700 |
| C | -0.35575500 | -0.16951300 | -1.40707400 |
| C | 1.62169600  | -0.65456300 | -2.62001600 |
| C | 3.14472700  | -0.95005800 | 0.03611000  |
| C | 3.44450300  | -1.30936800 | 1.36112700  |
| C | 4.12179400  | -1.17132000 | -0.94735800 |
| C | 4.65905300  | -1.89896900 | 1.68914400  |
| H | 2.70802100  | -1.11213800 | 2.13741900  |
| C | 5.33695200  | -1.76429400 | -0.61398100 |
| H | 3.94740100  | -0.87419400 | -1.97422600 |
| C | 5.61117300  | -2.13647600 | 0.69935400  |
| H | 4.86328200  | -2.17004200 | 2.72027900  |
| H | 6.07759400  | -1.92912500 | -1.39038400 |
| H | 6.56050700  | -2.59836900 | 0.95055400  |
| N | 2.05315800  | -0.90450400 | -3.66570600 |
| P | -1.57535900 | -0.54311100 | -0.19637100 |
| C | -2.67962500 | 0.83801100  | 0.17415000  |
| C | -3.45730100 | 0.85375800  | 1.33801100  |
| C | -2.84162900 | 1.83565000  | -0.79165000 |
| C | -4.37339600 | 1.87997500  | 1.54016900  |
| H | -3.34833400 | 0.07352200  | 2.08582300  |
| C | -3.76322400 | 2.85606000  | -0.58290600 |
| H | -2.24380000 | 1.81745400  | -1.69798800 |
| C | -4.52320800 | 2.88077600  | 0.58331800  |
| H | -4.96610600 | 1.89917800  | 2.44808600  |
| H | -3.88405600 | 3.63290900  | -1.33021700 |

|   |             |             |             |
|---|-------------|-------------|-------------|
| H | -5.23561500 | 3.68224800  | 0.74769200  |
| C | -0.87465800 | -1.20725400 | 1.33213200  |
| C | -0.40188200 | -2.52507000 | 1.31798200  |
| C | -0.71310600 | -0.41080700 | 2.46955300  |
| C | 0.23284900  | -3.04072700 | 2.44141200  |
| H | -0.52506100 | -3.14392700 | 0.43406100  |
| C | -0.07908600 | -0.93805800 | 3.59168500  |
| H | -1.06369300 | 0.61686300  | 2.47933500  |
| C | 0.39156600  | -2.24836300 | 3.57768000  |
| H | 0.60388600  | -4.05967600 | 2.42878000  |
| H | 0.06092000  | -0.31381800 | 4.46682900  |
| H | 0.88930800  | -2.65251900 | 4.45308100  |
| C | -2.62277900 | -1.84886400 | -0.92200600 |
| C | -3.96681400 | -1.96812000 | -0.55431600 |
| C | -2.05885400 | -2.76377700 | -1.81850700 |
| C | -4.73665500 | -3.00388000 | -1.07295500 |
| H | -4.41669700 | -1.25160300 | 0.12529800  |
| C | -2.83544800 | -3.79833000 | -2.33177200 |
| H | -1.01977800 | -2.66357100 | -2.11969100 |
| C | -4.17172800 | -3.91913600 | -1.95870700 |
| H | -5.77974200 | -3.09154000 | -0.78875100 |
| H | -2.39683700 | -4.50524300 | -3.02768500 |
| H | -4.77620600 | -4.72410300 | -2.36364500 |
| H | -0.79186800 | -0.09059700 | -2.39978700 |
| H | 1.29264000  | -0.13913100 | 0.73471700  |
| C | 2.98989500  | 2.39992600  | -2.67149600 |
| C | 1.75145500  | 2.83418600  | -3.17759600 |
| C | 0.59660400  | 3.07299500  | -2.45416700 |
| C | 3.29165500  | 1.98586400  | -1.39394200 |
| C | 0.33524700  | 2.93302000  | -1.08657900 |
| C | 2.42664700  | 1.76840400  | -0.28380900 |
| H | 3.81781100  | 2.40024800  | -3.37667700 |
| H | 1.71426600  | 3.05911300  | -4.23914200 |
| H | -0.23978500 | 3.46818100  | -3.02818700 |
| H | 4.32769700  | 1.71592500  | -1.20897500 |
| H | -0.62520200 | 3.32087900  | -0.75687800 |
| H | 2.97584600  | 1.57555800  | 0.63471400  |
| C | 1.14844600  | 2.42768100  | -0.05721300 |
| C | 0.69134700  | 2.48702300  | 1.28956200  |
| C | -0.52055100 | 3.13015100  | 1.64832800  |
| N | -1.51449300 | 3.65126500  | 1.95755300  |
| C | 1.45104600  | 1.95859200  | 2.36157700  |
| N | 2.07511900  | 1.50374300  | 3.23391700  |



M4 $\alpha$ 

|   |             |             |             |
|---|-------------|-------------|-------------|
| C | 1.90046200  | 0.26537600  | 0.03074400  |
| C | 1.09700700  | 0.69292500  | -0.97048400 |
| C | -0.27303000 | 0.09207400  | -1.20038800 |
| C | 1.49957800  | 1.69528900  | -1.91613400 |
| C | 3.28856200  | 0.62940000  | 0.31847100  |
| C | 3.74049100  | 0.46199000  | 1.63614400  |
| C | 4.18705200  | 1.08869200  | -0.65636900 |
| C | 5.04518400  | 0.78603900  | 1.98483400  |
| H | 3.05298000  | 0.07639600  | 2.38482500  |
| C | 5.49587200  | 1.40117900  | -0.30508400 |
| H | 3.87362100  | 1.17155700  | -1.69110900 |
| C | 5.92503200  | 1.26059500  | 1.01324800  |
| H | 5.38002900  | 0.65886400  | 3.00889200  |
| H | 6.18628600  | 1.74859700  | -1.06655900 |
| H | 6.94771900  | 1.50718000  | 1.27975200  |
| N | 1.75062500  | 2.54581200  | -2.66388900 |
| P | -1.41544100 | 0.59104400  | 0.19119500  |
| C | -0.70678500 | 0.33446900  | 1.83153900  |
| C | -0.03937500 | 1.37799200  | 2.48369800  |
| C | -0.73408000 | -0.94877900 | 2.39348800  |
| C | 0.61241800  | 1.13035100  | 3.68760500  |
| H | -0.02933300 | 2.37859000  | 2.06639400  |
| C | -0.07283500 | -1.18537700 | 3.59444000  |
| H | -1.28163000 | -1.75219300 | 1.91207900  |
| C | 0.60411700  | -0.15042600 | 4.23696400  |
| H | 1.12826200  | 1.93939200  | 4.19305300  |
| H | -0.08994100 | -2.18076900 | 4.02459200  |
| H | 1.11959600  | -0.34064900 | 5.17258200  |
| C | -1.78381700 | 2.35295600  | -0.04934200 |
| C | -3.12199800 | 2.76055800  | -0.10284000 |
| C | -0.76040200 | 3.30206800  | -0.18879300 |
| C | -3.43063200 | 4.10408400  | -0.29453500 |
| H | -3.92287000 | 2.03663400  | 0.00126000  |
| C | -1.08016500 | 4.64068400  | -0.38351500 |
| H | 0.28277900  | 3.01093900  | -0.14060200 |
| C | -2.41328000 | 5.04248000  | -0.43778100 |
| H | -4.46946600 | 4.41277700  | -0.33486500 |
| H | -0.28380200 | 5.36786000  | -0.49627800 |
| H | -2.65696400 | 6.08816500  | -0.59292400 |
| C | -2.97359800 | -0.30151100 | 0.05472000  |
| C | -3.71795500 | -0.59724700 | 1.20052500  |
| C | -3.47897500 | -0.60928000 | -1.21494500 |

|   |             |             |             |
|---|-------------|-------------|-------------|
| C | -4.94950300 | -1.23082600 | 1.07458500  |
| H | -3.34010100 | -0.34161200 | 2.18510900  |
| C | -4.70669100 | -1.24884600 | -1.32956300 |
| H | -2.92272900 | -0.35541700 | -2.11384700 |
| C | -5.43641300 | -1.56568200 | -0.18501900 |
| H | -5.52233500 | -1.47064300 | 1.96336900  |
| H | -5.09220100 | -1.50017200 | -2.31135500 |
| H | -6.39203300 | -2.07066200 | -0.27836500 |
| H | -0.73781400 | 0.62730900  | -2.03745500 |
| H | 1.46855200  | -0.44980200 | 0.72728000  |
| C | 2.17599000  | -1.04482700 | -3.50905200 |
| C | 0.80819700  | -1.21361900 | -3.92725800 |
| C | -0.25335300 | -1.50578300 | -3.14901300 |
| C | 2.71790900  | -1.58158000 | -2.37749100 |
| C | -0.29572300 | -1.43832400 | -1.64429500 |
| C | 2.07366600  | -2.29682200 | -1.32574800 |
| H | 2.85329100  | -0.58510500 | -4.22336700 |
| H | 0.63033400  | -1.15875100 | -5.00022400 |
| H | -1.19888800 | -1.74151400 | -3.63301500 |
| H | 3.80042400  | -1.50974700 | -2.28003100 |
| H | -1.27685900 | -1.81357300 | -1.34866500 |
| H | 2.73402000  | -2.89552400 | -0.70196700 |
| C | 0.73260700  | -2.34592100 | -1.00375300 |
| C | 0.24308900  | -3.24543000 | 0.00943500  |
| C | -1.12896100 | -3.41069200 | 0.28279700  |
| N | -2.26801400 | -3.51928100 | 0.52047000  |
| C | 1.12712000  | -4.09197700 | 0.71992800  |
| N | 1.87310200  | -4.76386100 | 1.31098200  |

M4γ

|   |             |             |             |
|---|-------------|-------------|-------------|
| C | -1.84160600 | -0.08909200 | -0.29544900 |
| C | -0.98336400 | -0.34598900 | -1.50909000 |
| C | 0.35417200  | -0.51459900 | -1.54208200 |
| C | -1.63172400 | -0.54974500 | -2.79114400 |
| C | -2.88522600 | -1.18034700 | -0.11203200 |
| C | -2.77821300 | -2.02253200 | 0.99801500  |
| C | -3.96045300 | -1.35098500 | -0.99098900 |
| C | -3.72159300 | -3.02113200 | 1.22565800  |
| H | -1.95736900 | -1.88248500 | 1.69771500  |
| C | -4.90263400 | -2.35016400 | -0.76189200 |
| H | -4.06797400 | -0.70218900 | -1.85337600 |
| C | -4.78556100 | -3.18916000 | 0.34331300  |
| H | -3.62557400 | -3.66322400 | 2.09563400  |

|   |             |             |             |
|---|-------------|-------------|-------------|
| H | -5.73181500 | -2.47046100 | -1.45162000 |
| H | -5.52262500 | -3.96636400 | 0.51774100  |
| N | -2.10481800 | -0.78886000 | -3.81974500 |
| P | 1.56133500  | -0.55266500 | -0.20070500 |
| C | 2.27689800  | 1.08059000  | 0.04139600  |
| C | 2.86164800  | 1.45472500  | 1.25637500  |
| C | 2.34946900  | 1.92306300  | -1.07379700 |
| C | 3.48802500  | 2.69272800  | 1.35683900  |
| H | 2.82697900  | 0.79522400  | 2.11752400  |
| C | 2.99674600  | 3.14824800  | -0.96618100 |
| H | 1.89216400  | 1.63261100  | -2.01526800 |
| C | 3.55380900  | 3.53584600  | 0.25020600  |
| H | 3.91746400  | 3.00063200  | 2.30324000  |
| H | 3.04718000  | 3.80602700  | -1.82728300 |
| H | 4.03748500  | 4.50269800  | 0.33919200  |
| C | 0.95808300  | -1.26195100 | 1.34940800  |
| C | 0.95640200  | -2.65481400 | 1.49374300  |
| C | 0.47722200  | -0.44194700 | 2.37674600  |
| C | 0.46874700  | -3.22081400 | 2.66674600  |
| H | 1.33721600  | -3.29587000 | 0.70566900  |
| C | -0.00675200 | -1.01898100 | 3.54670600  |
| H | 0.45990700  | 0.63749000  | 2.25709000  |
| C | -0.00868900 | -2.40505200 | 3.69119900  |
| H | 0.46561500  | -4.29925600 | 2.77968900  |
| H | -0.40403100 | -0.37725300 | 4.32416800  |
| H | -0.38907600 | -2.85074200 | 4.60429800  |
| C | 2.85592900  | -1.64560200 | -0.83936300 |
| C | 4.19062000  | -1.38639600 | -0.51429400 |
| C | 2.51838500  | -2.76675300 | -1.60774000 |
| C | 5.18532400  | -2.25299800 | -0.95577700 |
| H | 4.45487400  | -0.51005500 | 0.06953400  |
| C | 3.52050000  | -3.62785500 | -2.04202300 |
| H | 1.48275300  | -2.97093700 | -1.86688500 |
| C | 4.85097400  | -3.37095500 | -1.71638800 |
| H | 6.22166600  | -2.04992800 | -0.70933500 |
| H | 3.26072400  | -4.49594300 | -2.63756500 |
| H | 5.62975100  | -4.04278700 | -2.06138800 |
| H | 0.82772000  | -0.70026000 | -2.50398300 |
| H | -1.17246400 | -0.14741100 | 0.56543200  |
| C | -3.12975000 | 2.20818100  | -2.49815300 |
| C | -1.82792000 | 2.53600200  | -3.02263700 |
| C | -0.75179600 | 2.89647400  | -2.27079900 |
| C | -3.42534500 | 1.77636500  | -1.25645200 |
| C | -0.62011900 | 2.97357900  | -0.84822000 |

|   |             |            |             |
|---|-------------|------------|-------------|
| C | -2.46323900 | 1.35651600 | -0.17825800 |
| H | -3.96692500 | 2.36070200 | -3.17789600 |
| H | -1.73863700 | 2.60496300 | -4.10322300 |
| H | 0.12222700  | 3.24516600 | -2.82235700 |
| H | -4.47652900 | 1.67899600 | -0.99690800 |
| H | 0.21304300  | 3.57732300 | -0.49669800 |
| H | -3.06271100 | 1.25064600 | 0.73090100  |
| C | -1.38078400 | 2.37686300 | 0.12564000  |
| C | -1.11638600 | 2.61408100 | 1.52482800  |
| C | -0.12667800 | 3.53647800 | 1.93558100  |
| N | 0.70361100  | 4.29060900 | 2.25539800  |
| C | -1.77456600 | 1.90337400 | 2.54972400  |
| N | -2.30513600 | 1.29127400 | 3.39154300  |

TS5

|   |             |             |             |
|---|-------------|-------------|-------------|
| C | 2.14759400  | 0.63097100  | -0.96201200 |
| C | 1.03146400  | 0.70871000  | -0.03840700 |
| C | -0.10721000 | -0.10160300 | -0.56291100 |
| C | 1.24747100  | 0.81310000  | 1.35289900  |
| C | 3.48502200  | 1.19685600  | -0.60981700 |
| C | 4.18330800  | 0.81408900  | 0.54211700  |
| C | 4.08239500  | 2.10831100  | -1.48590000 |
| C | 5.44044700  | 1.34442200  | 0.81178000  |
| H | 3.74326900  | 0.09863500  | 1.22925000  |
| C | 5.33691200  | 2.64599000  | -1.21231600 |
| H | 3.55357500  | 2.40078700  | -2.38947700 |
| C | 6.01972700  | 2.26486400  | -0.06065200 |
| H | 5.97089200  | 1.03507400  | 1.70660500  |
| H | 5.78094100  | 3.35758000  | -1.90128600 |
| H | 7.00030500  | 2.67757100  | 0.15420500  |
| N | 1.41359600  | 0.96755500  | 2.49972000  |
| P | -1.74820200 | 0.37051800  | 0.09880700  |
| C | -2.96304000 | -0.83135500 | -0.49933800 |
| C | -3.54523400 | -1.77519300 | 0.34870400  |
| C | -3.23935000 | -0.85245900 | -1.87343500 |
| C | -4.38717500 | -2.75117000 | -0.18179600 |
| H | -3.35435000 | -1.75239400 | 1.41616200  |
| C | -4.08671000 | -1.82227400 | -2.39224900 |
| H | -2.79080900 | -0.11714500 | -2.53641900 |
| C | -4.65347400 | -2.77696600 | -1.54729600 |
| H | -4.83608400 | -3.48608200 | 0.47727800  |
| H | -4.30042900 | -1.83761900 | -3.45540400 |

|   |             |             |             |
|---|-------------|-------------|-------------|
| H | -5.31048400 | -3.53755800 | -1.95589600 |
| C | -1.78856800 | 0.45239500  | 1.89964500  |
| C | -2.15350900 | 1.65113400  | 2.51980300  |
| C | -1.41005200 | -0.65289000 | 2.67374800  |
| C | -2.14156100 | 1.73862600  | 3.90849800  |
| H | -2.43305800 | 2.51608700  | 1.92766500  |
| C | -1.39953000 | -0.55478900 | 4.05805400  |
| H | -1.10052800 | -1.58717600 | 2.21799400  |
| C | -1.76368400 | 0.64054800  | 4.67526300  |
| H | -2.41933900 | 2.67063000  | 4.38845700  |
| H | -1.09000500 | -1.41016200 | 4.64839000  |
| H | -1.74626900 | 0.71698000  | 5.75735200  |
| C | -2.21638900 | 1.97496200  | -0.58870900 |
| C | -3.57775100 | 2.26745500  | -0.74298400 |
| C | -1.24452400 | 2.92680800  | -0.91466200 |
| C | -3.96188900 | 3.51220600  | -1.22840200 |
| H | -4.33158400 | 1.52674600  | -0.49165600 |
| C | -1.64268300 | 4.16620800  | -1.40822100 |
| H | -0.19288400 | 2.69351600  | -0.76812500 |
| C | -2.99511300 | 4.45878300  | -1.56346800 |
| H | -5.01533900 | 3.74025900  | -1.34856900 |
| H | -0.89157100 | 4.90529900  | -1.66533600 |
| H | -3.29941000 | 5.42817400  | -1.94445600 |
| C | 1.01797500  | -1.72070200 | -3.49528500 |
| C | -0.11283500 | -2.41268000 | -2.90742600 |
| C | -0.47001900 | -2.45938900 | -1.61060500 |
| C | 2.11289900  | -1.23475900 | -2.86908500 |
| C | 0.16708600  | -1.69534400 | -0.48738600 |
| C | 2.44757700  | -1.17960300 | -1.44526200 |
| H | 1.00129500  | -1.63651300 | -4.57876100 |
| H | -0.74081200 | -2.96134200 | -3.60625900 |
| H | -1.33055300 | -3.06457700 | -1.33681500 |
| H | 2.86780000  | -0.76633700 | -3.49967500 |
| H | 3.52011100  | -1.27294300 | -1.27808400 |
| C | 1.65694000  | -1.88449800 | -0.45408700 |
| C | 2.24026400  | -2.47564700 | 0.64225500  |
| C | 3.65520500  | -2.67924900 | 0.73360700  |
| N | 4.80056500  | -2.84137100 | 0.80885400  |
| C | 1.46997500  | -2.92507300 | 1.76201100  |
| N | 0.82745700  | -3.27983800 | 2.66033400  |
| H | 1.84806000  | 0.95556800  | -1.96117200 |
| H | -0.21447000 | 0.11280100  | -1.63927400 |
| H | -0.24831100 | -2.07282500 | 0.44881000  |

M5

|   |             |             |             |
|---|-------------|-------------|-------------|
| C | 1.98817600  | -0.06536300 | -0.07584200 |
| C | 1.09189300  | 0.71981600  | -0.97859800 |
| C | -0.24361100 | 0.15737500  | -1.27683100 |
| C | 1.54577400  | 1.74338500  | -1.80961800 |
| C | 3.36303300  | 0.50694300  | 0.19765400  |
| C | 3.80636000  | 0.58238800  | 1.52146000  |
| C | 4.23172900  | 0.92175200  | -0.81953900 |
| C | 5.07335200  | 1.07000200  | 1.83095900  |
| H | 3.14462400  | 0.25267300  | 2.31892700  |
| C | 5.49865300  | 1.41023000  | -0.51211900 |
| H | 3.91648000  | 0.86540200  | -1.85546000 |
| C | 5.92426700  | 1.48854200  | 0.81220900  |
| H | 5.39366200  | 1.12178700  | 2.86695400  |
| H | 6.15631500  | 1.73135700  | -1.31382300 |
| H | 6.91254500  | 1.87142400  | 1.04672600  |
| N | 1.85297100  | 2.65011700  | -2.48880600 |
| P | -1.50078600 | 0.58846900  | 0.07117900  |
| C | -2.04320700 | 2.30219800  | -0.18622100 |
| C | -3.34443100 | 2.64841600  | 0.20214700  |
| C | -1.19395600 | 3.27361700  | -0.73052000 |
| C | -3.78959300 | 3.95635200  | 0.04711000  |
| H | -4.01310400 | 1.90089100  | 0.61706300  |
| C | -1.65424300 | 4.57839900  | -0.88580300 |
| H | -0.18251500 | 3.03225500  | -1.03616700 |
| C | -2.94630100 | 4.92189200  | -0.49792600 |
| H | -4.79859900 | 4.21766200  | 0.34729800  |
| H | -0.99293600 | 5.32418500  | -1.31334700 |
| H | -3.29842700 | 5.94071600  | -0.62183100 |
| C | -3.00127600 | -0.42454100 | 0.00462700  |
| C | -3.68649700 | -0.83107000 | 1.15406300  |
| C | -3.50881200 | -0.74787300 | -1.26118300 |
| C | -4.85142100 | -1.58370900 | 1.03393100  |
| H | -3.32177100 | -0.55739500 | 2.13874200  |
| C | -4.66949600 | -1.50293100 | -1.37254100 |
| H | -3.00303300 | -0.40864100 | -2.16264600 |
| C | -5.33572400 | -1.92783900 | -0.22444100 |
| H | -5.37822400 | -1.90152800 | 1.92709800  |
| H | -5.05342000 | -1.75857500 | -2.35404000 |
| H | -6.23884100 | -2.52252800 | -0.31196200 |
| C | -0.74712600 | 0.45872800  | 1.70576300  |
| C | -0.05002800 | 1.56602400  | 2.19971200  |
| C | -0.70299300 | -0.76477300 | 2.38801800  |

|   |             |             |             |
|---|-------------|-------------|-------------|
| C | 0.69605900  | 1.44390700  | 3.36829300  |
| H | -0.07765400 | 2.51272700  | 1.66980700  |
| C | 0.04349100  | -0.87694900 | 3.55528600  |
| H | -1.24389300 | -1.62795300 | 2.01144900  |
| C | 0.74645300  | 0.22533900  | 4.04127200  |
| H | 1.24411000  | 2.30019900  | 3.74625600  |
| H | 0.08257300  | -1.82610200 | 4.07869200  |
| H | 1.33450000  | 0.13315700  | 4.94868600  |
| C | 2.59468600  | -1.69127100 | -3.09540000 |
| C | 1.25511500  | -1.62653400 | -3.67581400 |
| C | 0.06295900  | -1.55217200 | -3.06864500 |
| C | 2.96419700  | -1.72346500 | -1.80668900 |
| C | -0.23137600 | -1.39965300 | -1.60348600 |
| C | 2.12041400  | -1.59954100 | -0.57979000 |
| H | 3.39581200  | -1.75770200 | -3.82747800 |
| H | 1.23389000  | -1.67843700 | -4.76178300 |
| H | -0.82612600 | -1.55307900 | -3.69531100 |
| H | 4.02702400  | -1.80682700 | -1.59563600 |
| H | -1.22988600 | -1.81075300 | -1.43723100 |
| H | 2.62987000  | -2.12882300 | 0.23187200  |
| C | 0.72495200  | -2.10592400 | -0.69227100 |
| C | 0.26838300  | -3.09578100 | 0.13046800  |
| C | 1.10813900  | -3.74529100 | 1.09737000  |
| N | 1.76605400  | -4.26441100 | 1.89692400  |
| C | -1.10311400 | -3.52477800 | 0.13124300  |
| N | -2.21487300 | -3.85217400 | 0.14923300  |
| H | 1.52083300  | -0.20352500 | 0.90653800  |
| H | -0.68035000 | 0.66059000  | -2.14840600 |

TS6

|   |             |             |             |
|---|-------------|-------------|-------------|
| C | 2.06281500  | -0.01646400 | -0.02009100 |
| C | 1.17064500  | 0.75171600  | -0.96186500 |
| C | -0.12188900 | 0.21663600  | -1.33333400 |
| C | 1.53193500  | 2.00523200  | -1.46143200 |
| C | 3.46016100  | 0.53988100  | 0.16726500  |
| C | 4.00411800  | 0.58065100  | 1.45305800  |
| C | 4.24954500  | 0.96746000  | -0.90693300 |
| C | 5.30083400  | 1.04109800  | 1.66982900  |
| H | 3.39840200  | 0.24892000  | 2.29335300  |
| C | 5.54397800  | 1.43091400  | -0.69286200 |
| H | 3.84580100  | 0.93517400  | -1.91354900 |
| C | 6.07430400  | 1.47033400  | 0.59541100  |
| H | 5.70323700  | 1.06773700  | 2.67771100  |

|   |             |             |             |
|---|-------------|-------------|-------------|
| H | 6.14073100  | 1.76251100  | -1.53678900 |
| H | 7.08346800  | 1.83499700  | 0.75917700  |
| N | 1.78801600  | 3.06444200  | -1.89433600 |
| P | -1.57317200 | 0.57662700  | 0.05372200  |
| C | -2.25110500 | 2.24275300  | -0.21486500 |
| C | -3.59177500 | 2.49197300  | 0.11150100  |
| C | -1.46058900 | 3.27449900  | -0.73500400 |
| C | -4.12981100 | 3.75963600  | -0.07927100 |
| H | -4.21751100 | 1.70016400  | 0.51018500  |
| C | -2.01085400 | 4.54033600  | -0.92319100 |
| H | -0.42001400 | 3.11487000  | -0.99465500 |
| C | -3.34150800 | 4.78476700  | -0.59813200 |
| H | -5.16806200 | 3.94442100  | 0.17527300  |
| H | -1.38957400 | 5.33186300  | -1.32840900 |
| H | -3.76626600 | 5.77180800  | -0.74906900 |
| C | -3.02022500 | -0.51863900 | 0.05850100  |
| C | -3.64402800 | -0.95885300 | 1.23087200  |
| C | -3.56154100 | -0.86301200 | -1.18773100 |
| C | -4.77929700 | -1.76072300 | 1.15115200  |
| H | -3.25790100 | -0.66736700 | 2.20222700  |
| C | -4.69660100 | -1.66125500 | -1.25944900 |
| H | -3.10429200 | -0.49989500 | -2.10596600 |
| C | -5.30051100 | -2.11709300 | -0.08932300 |
| H | -5.25777000 | -2.10302500 | 2.06253100  |
| H | -5.10777700 | -1.92776600 | -2.22705000 |
| H | -6.18266800 | -2.74607800 | -0.14449800 |
| C | -0.75992800 | 0.52929100  | 1.66328700  |
| C | -0.06349100 | 1.66619100  | 2.08729500  |
| C | -0.61855100 | -0.67910800 | 2.36083200  |
| C | 0.77673500  | 1.58839400  | 3.19522100  |
| H | -0.16448400 | 2.60507000  | 1.55152200  |
| C | 0.21425500  | -0.74641400 | 3.47120400  |
| H | -1.14763400 | -1.56973700 | 2.03475900  |
| C | 0.91904800  | 0.38557400  | 3.88265000  |
| H | 1.32578500  | 2.46785400  | 3.51401100  |
| H | 0.32308800  | -1.68505500 | 4.00400200  |
| H | 1.57933200  | 0.32860900  | 4.74202700  |
| C | 2.72110700  | -1.81611300 | -2.95213700 |
| C | 1.41320400  | -1.73294700 | -3.60442900 |
| C | 0.20276000  | -1.55288400 | -3.06345200 |
| C | 3.03496900  | -1.75919000 | -1.65096900 |
| C | -0.14662300 | -1.32497100 | -1.61479500 |
| C | 2.14504400  | -1.54308600 | -0.46062700 |
| H | 3.55157700  | -1.95990500 | -3.63890200 |



|   |             |             |             |
|---|-------------|-------------|-------------|
| H | 1.44286100  | -1.84755700 | -4.68529300 |
| H | -0.65735500 | -1.53181700 | -3.72853200 |
| H | 4.08596900  | -1.85215700 | -1.39013100 |
| H | -1.16320900 | -1.70370700 | -1.47992400 |
| H | 2.60133800  | -2.07231900 | 0.38286900  |
| C | 0.74819500  | -2.03937900 | -0.64467900 |
| C | 0.25758600  | -3.05571800 | 0.11589900  |
| C | 1.04127000  | -3.70583900 | 1.13095400  |
| N | 1.64856200  | -4.22172400 | 1.97106500  |
| C | -1.09459200 | -3.53223400 | 0.00223600  |
| N | -2.18246900 | -3.92356300 | -0.06931400 |
| H | 1.62704000  | -0.07479300 | 0.98576100  |
| H | -0.56284000 | 0.74320800  | -2.18594200 |

P

|   |             |             |             |
|---|-------------|-------------|-------------|
| C | -0.33334500 | 1.24765200  | 0.65638600  |
| C | 0.39536400  | 1.95148800  | -0.47103600 |
| C | 1.34926400  | 1.37096900  | -1.20960400 |
| C | 0.00605400  | 3.30738500  | -0.75254100 |
| C | -1.69848300 | 0.70944000  | 0.26143200  |
| C | -2.68127600 | 0.57641200  | 1.24628700  |
| C | -1.97339400 | 0.26995700  | -1.03456400 |
| C | -3.91555500 | 0.01256100  | 0.94259700  |
| H | -2.47393300 | 0.91583000  | 2.25836300  |
| C | -3.21051700 | -0.29251900 | -1.34084200 |
| H | -1.22279600 | 0.37437100  | -1.81344200 |
| C | -4.18283100 | -0.42363300 | -0.35365300 |
| H | -4.66955600 | -0.08515300 | 1.71668400  |
| H | -3.41229700 | -0.62760800 | -2.35300800 |
| H | -5.14598200 | -0.86268800 | -0.59223300 |
| N | -0.32537300 | 4.39742300  | -0.95883400 |
| C | 3.06286400  | 0.71347300  | 1.65065500  |
| C | 3.76466100  | 0.15833200  | 0.48964800  |
| C | 3.24202900  | -0.18884900 | -0.69270000 |
| C | 1.75552400  | 0.70694400  | 1.94422200  |
| C | 1.76690700  | -0.06968900 | -1.03636300 |
| C | 0.58878800  | 0.10592100  | 1.20249600  |
| H | 3.71211800  | 1.19354900  | 2.37855600  |
| H | 4.83914800  | 0.04775400  | 0.61035600  |
| H | 3.88652800  | -0.59386200 | -1.46599700 |
| H | 1.45030700  | 1.20593600  | 2.86202900  |
| H | 1.60126700  | -0.57450300 | -1.99478000 |
| C | 0.95706300  | -0.74995000 | 0.03478300  |

|   |             |             |             |
|---|-------------|-------------|-------------|
| C | 0.54640700  | -2.03281800 | -0.08649400 |
| C | 0.86751400  | -2.81621500 | -1.24911200 |
| N | 1.14071300  | -3.43239100 | -2.18959100 |
| C | -0.23500400 | -2.68346800 | 0.93040500  |
| N | -0.86866200 | -3.20033500 | 1.74896500  |
| H | -0.46919900 | 1.96052500  | 1.47733100  |
| H | 1.85286300  | 1.92472400  | -1.99619100 |
| H | -0.00741200 | -0.47211700 | 1.91655300  |
